# Supplementary material for: Implementation of a Web-Based Resilience Enhancement Training for Nurses: Pilot Randomized Controlled Trial
Source: PubMed Central journal article supplement (PMC9975925; doi:10.2196/43771), 2023-02-14
Supplement: jmir_v25i1e43771_app3.pdf [file jmir_v25i1e43771_app3.pdf]

| CONSORT-EHEALTH Checklist V1.6.2 Report                                                                                                                                                                                                                                                                                                                                                                                                                                                                                                                                                                                                                                                                                                                                                                                                                                                                                                                                                                                                                                                                                                                                                                                                                                                                                                                                                                                                                                                                                                                                                                                                                      | Manuscript Number | 43771 |
|--------------------------------------------------------------------------------------------------------------------------------------------------------------------------------------------------------------------------------------------------------------------------------------------------------------------------------------------------------------------------------------------------------------------------------------------------------------------------------------------------------------------------------------------------------------------------------------------------------------------------------------------------------------------------------------------------------------------------------------------------------------------------------------------------------------------------------------------------------------------------------------------------------------------------------------------------------------------------------------------------------------------------------------------------------------------------------------------------------------------------------------------------------------------------------------------------------------------------------------------------------------------------------------------------------------------------------------------------------------------------------------------------------------------------------------------------------------------------------------------------------------------------------------------------------------------------------------------------------------------------------------------------------------|-------------------|-------|
| <b>(based on CONSORT-EHEALTH V1.6), available at [http://tinyurl.com/consort-ehealth-v1-6].</b>                                                                                                                                                                                                                                                                                                                                                                                                                                                                                                                                                                                                                                                                                                                                                                                                                                                                                                                                                                                                                                                                                                                                                                                                                                                                                                                                                                                                                                                                                                                                                              |                   |       |
| <b>Date completed</b>                                                                                                                                                                                                                                                                                                                                                                                                                                                                                                                                                                                                                                                                                                                                                                                                                                                                                                                                                                                                                                                                                                                                                                                                                                                                                                                                                                                                                                                                                                                                                                                                                                        |                   |       |
| 2/11/2023 12:09:14                                                                                                                                                                                                                                                                                                                                                                                                                                                                                                                                                                                                                                                                                                                                                                                                                                                                                                                                                                                                                                                                                                                                                                                                                                                                                                                                                                                                                                                                                                                                                                                                                                           |                   |       |
| <b>by</b>                                                                                                                                                                                                                                                                                                                                                                                                                                                                                                                                                                                                                                                                                                                                                                                                                                                                                                                                                                                                                                                                                                                                                                                                                                                                                                                                                                                                                                                                                                                                                                                                                                                    |                   |       |
| Catherine Henshall                                                                                                                                                                                                                                                                                                                                                                                                                                                                                                                                                                                                                                                                                                                                                                                                                                                                                                                                                                                                                                                                                                                                                                                                                                                                                                                                                                                                                                                                                                                                                                                                                                           |                   |       |
| Implementation of a Web-Based Resilience Enhancement Training for Nurses: A Pilot Randomized Controlled Trial                                                                                                                                                                                                                                                                                                                                                                                                                                                                                                                                                                                                                                                                                                                                                                                                                                                                                                                                                                                                                                                                                                                                                                                                                                                                                                                                                                                                                                                                                                                                                |                   |       |
| <b>TITLE</b>                                                                                                                                                                                                                                                                                                                                                                                                                                                                                                                                                                                                                                                                                                                                                                                                                                                                                                                                                                                                                                                                                                                                                                                                                                                                                                                                                                                                                                                                                                                                                                                                                                                 |                   |       |
| <b>1a-i) Identify the mode of delivery in the title</b>                                                                                                                                                                                                                                                                                                                                                                                                                                                                                                                                                                                                                                                                                                                                                                                                                                                                                                                                                                                                                                                                                                                                                                                                                                                                                                                                                                                                                                                                                                                                                                                                      |                   |       |
| "Implementation of a Web-Based Resilience Enhancement Training for Nurse s: Pilot Randomized Controlled Trial"                                                                                                                                                                                                                                                                                                                                                                                                                                                                                                                                                                                                                                                                                                                                                                                                                                                                                                                                                                                                                                                                                                                                                                                                                                                                                                                                                                                                                                                                                                                                               |                   |       |
| <b>1a-ii) Non-web-based components or important co-interventions in title</b>                                                                                                                                                                                                                                                                                                                                                                                                                                                                                                                                                                                                                                                                                                                                                                                                                                                                                                                                                                                                                                                                                                                                                                                                                                                                                                                                                                                                                                                                                                                                                                                |                   |       |
| there are no additional components                                                                                                                                                                                                                                                                                                                                                                                                                                                                                                                                                                                                                                                                                                                                                                                                                                                                                                                                                                                                                                                                                                                                                                                                                                                                                                                                                                                                                                                                                                                                                                                                                           |                   |       |
| <b>1a-iii) Primary condition or target group in the title</b>                                                                                                                                                                                                                                                                                                                                                                                                                                                                                                                                                                                                                                                                                                                                                                                                                                                                                                                                                                                                                                                                                                                                                                                                                                                                                                                                                                                                                                                                                                                                                                                                |                   |       |
| "Implementation of a Web-Based Resilience Enhancement Training for Nurses: Pilot Randomized Controlled Trial"                                                                                                                                                                                                                                                                                                                                                                                                                                                                                                                                                                                                                                                                                                                                                                                                                                                                                                                                                                                                                                                                                                                                                                                                                                                                                                                                                                                                                                                                                                                                                |                   |       |
| <b>ABSTRACT</b>                                                                                                                                                                                                                                                                                                                                                                                                                                                                                                                                                                                                                                                                                                                                                                                                                                                                                                                                                                                                                                                                                                                                                                                                                                                                                                                                                                                                                                                                                                                                                                                                                                              |                   |       |
| <b>1b-i) Key features/functionalities/components of the intervention and comparator in the METHODS section of the ABSTRACT</b>                                                                                                                                                                                                                                                                                                                                                                                                                                                                                                                                                                                                                                                                                                                                                                                                                                                                                                                                                                                                                                                                                                                                                                                                                                                                                                                                                                                                                                                                                                                               |                   |       |
| "Nurses were invited to participate and were randomly assigned to a waitlist group or REsOluTioN group. Training lasted for 4 weeks, consisting of pre-reading, web-based-facilitated sessions, and mentorship support."                                                                                                                                                                                                                                                                                                                                                                                                                                                                                                                                                                                                                                                                                                                                                                                                                                                                                                                                                                                                                                                                                                                                                                                                                                                                                                                                                                                                                                     |                   |       |
| <b>1b-ii) Level of human involvement in the METHODS section of the ABSTRACT</b>                                                                                                                                                                                                                                                                                                                                                                                                                                                                                                                                                                                                                                                                                                                                                                                                                                                                                                                                                                                                                                                                                                                                                                                                                                                                                                                                                                                                                                                                                                                                                                              |                   |       |
| not applicable to the paper                                                                                                                                                                                                                                                                                                                                                                                                                                                                                                                                                                                                                                                                                                                                                                                                                                                                                                                                                                                                                                                                                                                                                                                                                                                                                                                                                                                                                                                                                                                                                                                                                                  |                   |       |
| <b>1b-iii) Open vs. closed, web-based (self-assessment) vs. face-to-face assessments in the METHODS section of the ABSTRACT</b>                                                                                                                                                                                                                                                                                                                                                                                                                                                                                                                                                                                                                                                                                                                                                                                                                                                                                                                                                                                                                                                                                                                                                                                                                                                                                                                                                                                                                                                                                                                              |                   |       |
| information included in the paper                                                                                                                                                                                                                                                                                                                                                                                                                                                                                                                                                                                                                                                                                                                                                                                                                                                                                                                                                                                                                                                                                                                                                                                                                                                                                                                                                                                                                                                                                                                                                                                                                            |                   |       |
| <b>1b-iv) RESULTS section in abstract must contain use data</b>                                                                                                                                                                                                                                                                                                                                                                                                                                                                                                                                                                                                                                                                                                                                                                                                                                                                                                                                                                                                                                                                                                                                                                                                                                                                                                                                                                                                                                                                                                                                                                                              |                   |       |
| yes, this information is in the paper                                                                                                                                                                                                                                                                                                                                                                                                                                                                                                                                                                                                                                                                                                                                                                                                                                                                                                                                                                                                                                                                                                                                                                                                                                                                                                                                                                                                                                                                                                                                                                                                                        |                   |       |
| <b>1b-v) CONCLUSIONS/DISCUSSION in abstract for negative trials</b>                                                                                                                                                                                                                                                                                                                                                                                                                                                                                                                                                                                                                                                                                                                                                                                                                                                                                                                                                                                                                                                                                                                                                                                                                                                                                                                                                                                                                                                                                                                                                                                          |                   |       |
| Information available in accepted paper                                                                                                                                                                                                                                                                                                                                                                                                                                                                                                                                                                                                                                                                                                                                                                                                                                                                                                                                                                                                                                                                                                                                                                                                                                                                                                                                                                                                                                                                                                                                                                                                                      |                   |       |
| <b>INTRODUCTION</b>                                                                                                                                                                                                                                                                                                                                                                                                                                                                                                                                                                                                                                                                                                                                                                                                                                                                                                                                                                                                                                                                                                                                                                                                                                                                                                                                                                                                                                                                                                                                                                                                                                          |                   |       |
| <b>2a-i) Problem and the type of system/solution</b>                                                                                                                                                                                                                                                                                                                                                                                                                                                                                                                                                                                                                                                                                                                                                                                                                                                                                                                                                                                                                                                                                                                                                                                                                                                                                                                                                                                                                                                                                                                                                                                                         |                   |       |
| "The development of evidence-based strategies to improve the psychological well-being of health care staff and mitigate against burnout has been cited as a key priority [11], with resilience-enhancement programs identified as one tool to help address this problem [12-15]. Resilience-building programs can provide targeted support for staff who are enduring unprecedented levels of stress and burnout, with recognized importance in contributing to increased psychological health and well-being in nurses [16-19]. They can also aid recruitment and retention within international health care organizations [20,21].... As a result of the need for targeted resilience-enhancement programs within the nursing setting, this paper reports on a pilot randomized controlled trial (RCT) that was designed to evaluate a web-based resilience-enhancement program for nurses [37]. The web-based training program, Resilience Enhancement Online Training for Nurses (REsOluTioN), was based on a face-to-face resilience-enhancement training program that had been previously piloted with nurses [6,29]. The design of the training program was also informed by a systematic review examining the effectiveness of web-based interventions to enhance resilience in health care professionals [35] and focus groups with nurses to gather information on what they felt should be the key features of such training programs [38]."                                                                                                                                                                                                      |                   |       |
| <b>2a-ii) Scientific background, rationale: What is known about the (type of) system</b>                                                                                                                                                                                                                                                                                                                                                                                                                                                                                                                                                                                                                                                                                                                                                                                                                                                                                                                                                                                                                                                                                                                                                                                                                                                                                                                                                                                                                                                                                                                                                                     |                   |       |
| "Several resilience-enhancement programs have been developed for health care professionals, using both group and individual programs, delivered in a range of contexts and using blended models of delivery [4, 21,23-29]. These include resilience-building wellness apps [30], mentorship programs [20], Balint group sessions with colleagues, and access to resilience training programs for frontline health care staff [31]. Resilience programs have been found to enhance resilience and support retention and recruitment of health care staff [6,21,24-27,32], and systematic reviews have reported some evidence of their effectiveness and value in the health care population [22,24,33,34]. However, there is limited evidence regarding how these benefits are provided and which types of programs work for which staff and in what context. A recent review examining the use of web-based resilience-enhancement interventions showed them to have potential value in clinical practice settings by supporting staff who experienced prolonged workplace stress [35]. This is particularly important as the development of effective and evidence-based web-based programs can play a vital role in the current pandemic climate, where face-to-face training or meetings are often restricted or not allowed [36]. Web-based modes of delivery increase easy access and flexibility and decrease the need for face-to-face only interactions."                                                                                                                                                                                            |                   |       |
| <b>Does your paper address CONSORT subitem 2b?</b>                                                                                                                                                                                                                                                                                                                                                                                                                                                                                                                                                                                                                                                                                                                                                                                                                                                                                                                                                                                                                                                                                                                                                                                                                                                                                                                                                                                                                                                                                                                                                                                                           |                   |       |
| "The aim of this paper is to report on the implementation and evaluation of the REsOluTioN pilot RCT. Specific study objectives were to (1) explore participants' engagement with the REsOluTioN trial, assessed by the number of nurses recruited to it; (2) explore the acceptability of the REsOluTioN program, assessed by participant retention numbers and data on how the training impacted participants' views on resilience, communication, clinical practice, and workplace relationships; and(3) compare levels of resilience and psychological well-being in nurses who completed REsOluTioN program with nurses who did not (waitlist control arm)."                                                                                                                                                                                                                                                                                                                                                                                                                                                                                                                                                                                                                                                                                                                                                                                                                                                                                                                                                                                            |                   |       |
| <b>METHODS</b>                                                                                                                                                                                                                                                                                                                                                                                                                                                                                                                                                                                                                                                                                                                                                                                                                                                                                                                                                                                                                                                                                                                                                                                                                                                                                                                                                                                                                                                                                                                                                                                                                                               |                   |       |
| <b>3a) CONSORT: Description of trial design (such as parallel, factorial) including allocation ratio</b>                                                                                                                                                                                                                                                                                                                                                                                                                                                                                                                                                                                                                                                                                                                                                                                                                                                                                                                                                                                                                                                                                                                                                                                                                                                                                                                                                                                                                                                                                                                                                     |                   |       |
| "The study was a 1:1 two-armed pilot randomized trial."                                                                                                                                                                                                                                                                                                                                                                                                                                                                                                                                                                                                                                                                                                                                                                                                                                                                                                                                                                                                                                                                                                                                                                                                                                                                                                                                                                                                                                                                                                                                                                                                      |                   |       |
| <b>3b) CONSORT: Important changes to methods after trial commencement (such as eligibility criteria), with reasons</b>                                                                                                                                                                                                                                                                                                                                                                                                                                                                                                                                                                                                                                                                                                                                                                                                                                                                                                                                                                                                                                                                                                                                                                                                                                                                                                                                                                                                                                                                                                                                       |                   |       |
| Not applicable for this study                                                                                                                                                                                                                                                                                                                                                                                                                                                                                                                                                                                                                                                                                                                                                                                                                                                                                                                                                                                                                                                                                                                                                                                                                                                                                                                                                                                                                                                                                                                                                                                                                                |                   |       |
| <b>3b-i) Bug fixes, Downtimes, Content Changes</b>                                                                                                                                                                                                                                                                                                                                                                                                                                                                                                                                                                                                                                                                                                                                                                                                                                                                                                                                                                                                                                                                                                                                                                                                                                                                                                                                                                                                                                                                                                                                                                                                           |                   |       |
| <b>4a) CONSORT: Eligibility criteria for participants</b>                                                                                                                                                                                                                                                                                                                                                                                                                                                                                                                                                                                                                                                                                                                                                                                                                                                                                                                                                                                                                                                                                                                                                                                                                                                                                                                                                                                                                                                                                                                                                                                                    |                   |       |
| "We invited nonagency nurses of different levels of seniority, working across a wide range of clinical settings from the participating NHS trust to participate."                                                                                                                                                                                                                                                                                                                                                                                                                                                                                                                                                                                                                                                                                                                                                                                                                                                                                                                                                                                                                                                                                                                                                                                                                                                                                                                                                                                                                                                                                            |                   |       |
| <b>4a-i) Computer / Internet literacy</b>                                                                                                                                                                                                                                                                                                                                                                                                                                                                                                                                                                                                                                                                                                                                                                                                                                                                                                                                                                                                                                                                                                                                                                                                                                                                                                                                                                                                                                                                                                                                                                                                                    |                   |       |
| <b>4a-ii) Open vs. closed, web-based vs. face-to-face assessments:</b>                                                                                                                                                                                                                                                                                                                                                                                                                                                                                                                                                                                                                                                                                                                                                                                                                                                                                                                                                                                                                                                                                                                                                                                                                                                                                                                                                                                                                                                                                                                                                                                       |                   |       |
| "We used posters on the participating trust's website, social media platforms, and meetings with nursing staff, research delivery teams, and trust communications teams to promote the study. The participating trust's chief nurse also shared information about the trial with all nurses employed by the trust, using email communications and web-based meeting forums. Nurses who were interested in taking part were provided with a Qualtrics survey web link that contained a study information sheet and consent form. Upon providing consent, they were asked to provide demographic information and complete a prestudy survey.... The REsOluTioN program was hosted on the Totara learning management system (Version 12), via the Learning and Development information technology team at the participating trust. The web-based training was conducted over 4 weeks and covered weekly modules on (1) building hardiness and maintaining a positive outlook; (2) intellectual flexibility and emotional intelligence; (3) reflective and critical thinking; and (4) achieving life balance and enabling spirituality. A blended synchronous and asynchronous learning approach was used that included (1) web-based 4x120 minutes large-group facilitated sessions on the weekly modules led by experienced senior nurses and other senior multidisciplinary health care staff; (2) 4x30 minute independent preparatory learning on the module topics prior to the large-group facilitated sessions; and (3) 8 small group mentoring sessions led by senior nurses and delivered between 30 and 60 minutes at flexible timings, twice weekly." |                   |       |
| <b>4a-iii) Information giving during recruitment</b>                                                                                                                                                                                                                                                                                                                                                                                                                                                                                                                                                                                                                                                                                                                                                                                                                                                                                                                                                                                                                                                                                                                                                                                                                                                                                                                                                                                                                                                                                                                                                                                                         |                   |       |
| <b>4b) CONSORT: Settings and locations where the data were collected</b>                                                                                                                                                                                                                                                                                                                                                                                                                                                                                                                                                                                                                                                                                                                                                                                                                                                                                                                                                                                                                                                                                                                                                                                                                                                                                                                                                                                                                                                                                                                                                                                     |                   |       |
| "It [the study] was conducted in a mental health and community National Health Service (NHS) trust in the South of England."                                                                                                                                                                                                                                                                                                                                                                                                                                                                                                                                                                                                                                                                                                                                                                                                                                                                                                                                                                                                                                                                                                                                                                                                                                                                                                                                                                                                                                                                                                                                 |                   |       |
| <b>4b-i) Report if outcomes were (self-)assessed through online questionnaires</b>                                                                                                                                                                                                                                                                                                                                                                                                                                                                                                                                                                                                                                                                                                                                                                                                                                                                                                                                                                                                                                                                                                                                                                                                                                                                                                                                                                                                                                                                                                                                                                           |                   |       |
| Participants completed online pre and post study surveys via the online Qualtrics platform.                                                                                                                                                                                                                                                                                                                                                                                                                                                                                                                                                                                                                                                                                                                                                                                                                                                                                                                                                                                                                                                                                                                                                                                                                                                                                                                                                                                                                                                                                                                                                                  |                   |       |
| "Nurses who were interested in taking part were provided with a Qualtrics survey web link that contained a study information sheet and consent form. Upon providing consent, they were asked to provide demographic information and complete a prestudy survey... After 6 weeks, participants from both arms were asked to complete a poststudy survey."                                                                                                                                                                                                                                                                                                                                                                                                                                                                                                                                                                                                                                                                                                                                                                                                                                                                                                                                                                                                                                                                                                                                                                                                                                                                                                     |                   |       |
| <b>4b-ii) Report how institutional affiliations are displayed</b>                                                                                                                                                                                                                                                                                                                                                                                                                                                                                                                                                                                                                                                                                                                                                                                                                                                                                                                                                                                                                                                                                                                                                                                                                                                                                                                                                                                                                                                                                                                                                                                            |                   |       |
| <b>5) CONSORT: Describe the interventions for each group with sufficient details to allow replication, including how and when they were actually administered</b>                                                                                                                                                                                                                                                                                                                                                                                                                                                                                                                                                                                                                                                                                                                                                                                                                                                                                                                                                                                                                                                                                                                                                                                                                                                                                                                                                                                                                                                                                            |                   |       |
| <b>5-i) Mention names, credential, affiliations of the developers, sponsors, and owners</b>                                                                                                                                                                                                                                                                                                                                                                                                                                                                                                                                                                                                                                                                                                                                                                                                                                                                                                                                                                                                                                                                                                                                                                                                                                                                                                                                                                                                                                                                                                                                                                  |                   |       |

|                                                                                                                                                                                                                                                                                                                                                                                                                                                                                                                                                                                                                                                                                                                                                                                                                                                                                                                                                                                                                                                                                                                                                                                                                                                                                                                                                                                                                                                                                                                                                                                                                                                                                                                                                                                                                                  |  |  |  |
|----------------------------------------------------------------------------------------------------------------------------------------------------------------------------------------------------------------------------------------------------------------------------------------------------------------------------------------------------------------------------------------------------------------------------------------------------------------------------------------------------------------------------------------------------------------------------------------------------------------------------------------------------------------------------------------------------------------------------------------------------------------------------------------------------------------------------------------------------------------------------------------------------------------------------------------------------------------------------------------------------------------------------------------------------------------------------------------------------------------------------------------------------------------------------------------------------------------------------------------------------------------------------------------------------------------------------------------------------------------------------------------------------------------------------------------------------------------------------------------------------------------------------------------------------------------------------------------------------------------------------------------------------------------------------------------------------------------------------------------------------------------------------------------------------------------------------------|--|--|--|
| <b>5-ii) Describe the history/development process</b>                                                                                                                                                                                                                                                                                                                                                                                                                                                                                                                                                                                                                                                                                                                                                                                                                                                                                                                                                                                                                                                                                                                                                                                                                                                                                                                                                                                                                                                                                                                                                                                                                                                                                                                                                                            |  |  |  |
| <b>5-iii) Revisions and updating</b>                                                                                                                                                                                                                                                                                                                                                                                                                                                                                                                                                                                                                                                                                                                                                                                                                                                                                                                                                                                                                                                                                                                                                                                                                                                                                                                                                                                                                                                                                                                                                                                                                                                                                                                                                                                             |  |  |  |
| <b>5-iv) Quality assurance methods</b>                                                                                                                                                                                                                                                                                                                                                                                                                                                                                                                                                                                                                                                                                                                                                                                                                                                                                                                                                                                                                                                                                                                                                                                                                                                                                                                                                                                                                                                                                                                                                                                                                                                                                                                                                                                           |  |  |  |
| <b>5-v) Ensure replicability by publishing the source code, and/or providing screenshots/screen-capture video, and/or providing flowcharts of the algorithms used</b>                                                                                                                                                                                                                                                                                                                                                                                                                                                                                                                                                                                                                                                                                                                                                                                                                                                                                                                                                                                                                                                                                                                                                                                                                                                                                                                                                                                                                                                                                                                                                                                                                                                            |  |  |  |
| <b>5-vi) Digital preservation</b>                                                                                                                                                                                                                                                                                                                                                                                                                                                                                                                                                                                                                                                                                                                                                                                                                                                                                                                                                                                                                                                                                                                                                                                                                                                                                                                                                                                                                                                                                                                                                                                                                                                                                                                                                                                                |  |  |  |
| <b>5-vii) Access</b><br>"Nurses who were interested in taking part were provided with a Qualtrics survey web link that contained a study information sheet and consent form. Upon providing consent, they were asked to provide demographic information and complete a prestudy survey.<br>The REsOluTioN program was hosted on the Totara learning management system (Version 12), via the Learning and Development information technology team at the participating trust."                                                                                                                                                                                                                                                                                                                                                                                                                                                                                                                                                                                                                                                                                                                                                                                                                                                                                                                                                                                                                                                                                                                                                                                                                                                                                                                                                    |  |  |  |
| <b>5-viii) Mode of delivery, features/functionality/components of the intervention and comparator, and the theoretical framework</b><br>"The REsOluTioN program was hosted on the Totara learning management system (Version 12), via the Learning and Development information technology team at the participating trust. The web-based training was conducted over 4 weeks and covered weekly modules on (1) building hardiness and maintaining a positive outlook; (2) intellectual flexibility and emotional intelligence; (3) reflective and critical thinking; and (4) achieving life balance and enabling spirituality.<br>A blended synchronous and asynchronous learning approach was used that included (1) web-based 4x120 minutes large-group facilitated sessions on the weekly modules led by experienced senior nurses and other senior multidisciplinary health care staff; (2) 4x30 minute independent preparatory learning on the module topics prior to the large-group facilitated sessions; and (3) 8 small group mentoring sessions led by senior nurses and delivered between 30 and 60 minutes at flexible timings, twice weekly.<br>Both large-group facilitated sessions and mentor meetings were delivered via Teams (Microsoft Corporation). Learning materials in the form of PowerPoint presentations, instructional videos created by the study team, case examples, and peer-reviewed journal articles were used. The facilitated sessions also included group discussions and breakout activities. More about the content and delivery of REsOluTioN program is found elsewhere [37]. To gain a training completion certificate, participants randomized to the REsOluTioN program were expected to attend all the large-group facilitated sessions and at least one mentor meeting each week." |  |  |  |
| <b>5-ix) Describe use parameters</b>                                                                                                                                                                                                                                                                                                                                                                                                                                                                                                                                                                                                                                                                                                                                                                                                                                                                                                                                                                                                                                                                                                                                                                                                                                                                                                                                                                                                                                                                                                                                                                                                                                                                                                                                                                                             |  |  |  |
| <b>5-x) Clarify the level of human involvement</b>                                                                                                                                                                                                                                                                                                                                                                                                                                                                                                                                                                                                                                                                                                                                                                                                                                                                                                                                                                                                                                                                                                                                                                                                                                                                                                                                                                                                                                                                                                                                                                                                                                                                                                                                                                               |  |  |  |
| <b>5-xi) Report any prompts/reminders used</b><br>No prompts or reminders were used once participants had signed up to the trial.                                                                                                                                                                                                                                                                                                                                                                                                                                                                                                                                                                                                                                                                                                                                                                                                                                                                                                                                                                                                                                                                                                                                                                                                                                                                                                                                                                                                                                                                                                                                                                                                                                                                                                |  |  |  |
| <b>5-xii) Describe any co-interventions (incl. training/support)</b><br>No additional training interventions were provided.                                                                                                                                                                                                                                                                                                                                                                                                                                                                                                                                                                                                                                                                                                                                                                                                                                                                                                                                                                                                                                                                                                                                                                                                                                                                                                                                                                                                                                                                                                                                                                                                                                                                                                      |  |  |  |
| <b>6a) CONSORT: Completely defined pre-specified primary and secondary outcome measures, including how and when they were assessed</b><br>"The following outcome data were collected:<br>(1) Participant Engagement: Data were collected on the number of nurses who expressed an interest in joining the trial and those randomized to assess recruitment success and participant engagement with the trial.<br>(2) Acceptability of the REsOluTioN program: Data were collected on how many participants were retained in the REsOluTioN program. Baseline Likert-style data were collected from all participants via a web-based prestudy survey to examine their understanding of resilience and the anticipated usefulness of the REsOluTioN tool in enhancing resilience levels, confidence, views on clinical practice, communication skills, and relationships with workplace colleagues. Six weeks later, participants were provided with this information again in a web-based poststudy survey to monitor any changes over time.<br>(3) Resilience and Psychological Well-being: The validated Brief Resilience Scale [40] and Warwick-Edinburgh Mental Wellbeing Scale [41] were used to measure changes in resilience, psychological health, and well-being over time between the REsOluTioN program and the waitlist control arms at 6 weeks."                                                                                                                                                                                                                                                                                                                                                                                                                                                                     |  |  |  |
| <b>6a-i) Online questionnaires: describe if they were validated for online use and apply CHERRIES items to describe how the questionnaires were designed/deployed</b>                                                                                                                                                                                                                                                                                                                                                                                                                                                                                                                                                                                                                                                                                                                                                                                                                                                                                                                                                                                                                                                                                                                                                                                                                                                                                                                                                                                                                                                                                                                                                                                                                                                            |  |  |  |
| <b>6a-ii) Describe whether and how "use" (including intensity of use/dosage) was defined/measured/monitored</b>                                                                                                                                                                                                                                                                                                                                                                                                                                                                                                                                                                                                                                                                                                                                                                                                                                                                                                                                                                                                                                                                                                                                                                                                                                                                                                                                                                                                                                                                                                                                                                                                                                                                                                                  |  |  |  |
| <b>6a-iii) Describe whether, how, and when qualitative feedback from participants was obtained</b>                                                                                                                                                                                                                                                                                                                                                                                                                                                                                                                                                                                                                                                                                                                                                                                                                                                                                                                                                                                                                                                                                                                                                                                                                                                                                                                                                                                                                                                                                                                                                                                                                                                                                                                               |  |  |  |
| <b>6b) CONSORT: Any changes to trial outcomes after the trial commenced, with reasons</b><br>"It [the study] was conducted in a mental health and community National Health Service (NHS) trust in the South of England."                                                                                                                                                                                                                                                                                                                                                                                                                                                                                                                                                                                                                                                                                                                                                                                                                                                                                                                                                                                                                                                                                                                                                                                                                                                                                                                                                                                                                                                                                                                                                                                                        |  |  |  |
| <b>7a) CONSORT: How sample size was determined</b>                                                                                                                                                                                                                                                                                                                                                                                                                                                                                                                                                                                                                                                                                                                                                                                                                                                                                                                                                                                                                                                                                                                                                                                                                                                                                                                                                                                                                                                                                                                                                                                                                                                                                                                                                                               |  |  |  |
| <b>7a-i) Describe whether and how expected attrition was taken into account when calculating the sample size</b>                                                                                                                                                                                                                                                                                                                                                                                                                                                                                                                                                                                                                                                                                                                                                                                                                                                                                                                                                                                                                                                                                                                                                                                                                                                                                                                                                                                                                                                                                                                                                                                                                                                                                                                 |  |  |  |
| <b>7b) CONSORT: When applicable, explanation of any interim analyses and stopping guidelines</b><br>"The following outcome data were collected:<br>(1) Participant Engagement: Data were collected on the number of nurses who expressed an interest in joining the trial and those randomized to assess recruitment success and participant engagement with the trial.<br>(2) Acceptability of the REsOluTioN program: Data were collected on how many participants were retained in the REsOluTioN program. Baseline Likert-style data were collected from all participants via a web-based prestudy survey to examine their understanding of resilience and the anticipated usefulness of the REsOluTioN tool in enhancing resilience levels, confidence, views on clinical practice, communication skills, and relationships with workplace colleagues. Six weeks later, participants were provided with this information again in a web-based poststudy survey to monitor any changes over time.<br>(3) Resilience and Psychological Well-being: The validated Brief Resilience Scale [40] and Warwick-Edinburgh Mental Wellbeing Scale [41] were used to measure changes in resilience, psychological health, and well-being over time between the REsOluTioN program and the waitlist control arms at 6 weeks."                                                                                                                                                                                                                                                                                                                                                                                                                                                                                                           |  |  |  |
| <b>8a) CONSORT: Method used to generate the random allocation sequence</b><br>"An independent team member who was not involved in the conduct of the trial, delivery of REsOluTioN program, or data analysis implemented the randomization and allocation. For randomization, we used a computer-generated random number sequence. For allocation concealment, we used sequentially numbered opaque-sealed envelopes that were opened only after entering the name of each participant on the envelope. A team member who was involved in data analysis was blinded to the group allocation. However, participants were not blinded to group allocation due to the nature of the training."                                                                                                                                                                                                                                                                                                                                                                                                                                                                                                                                                                                                                                                                                                                                                                                                                                                                                                                                                                                                                                                                                                                                      |  |  |  |
| <b>8b) CONSORT: Type of randomisation; details of any restriction (such as blocking and block size)</b><br>"The study was a 1:1 two-armed pilot randomized trial...An independent team member who was not involved in the conduct of the trial, delivery of REsOluTioN program, or data analysis implemented the randomization and allocation. For randomization, we used a computer-generated random number sequence. For allocation concealment, we used sequentially numbered opaque-sealed envelopes that were opened only after entering the name of each participant on the envelope. A team member who was involved in data analysis was blinded to the group allocation. However, participants were not blinded to group allocation due to the nature of the training."                                                                                                                                                                                                                                                                                                                                                                                                                                                                                                                                                                                                                                                                                                                                                                                                                                                                                                                                                                                                                                                  |  |  |  |
| <b>9) CONSORT: Mechanism used to implement the random allocation sequence (such as sequentially numbered containers), describing any steps taken to conceal the sequence until interventions were assigned</b><br>"The study was a 1:1 two-armed pilot randomized trial...An independent team member who was not involved in the conduct of the trial, delivery of REsOluTioN program, or data analysis implemented the randomization and allocation. For randomization, we used a computer-generated random number sequence. For allocation concealment, we used sequentially numbered opaque-sealed envelopes that were opened only after entering the name of each participant on the envelope. A team member who was involved in data analysis was blinded to the group allocation. However, participants were not blinded to group allocation due to the nature of the training."                                                                                                                                                                                                                                                                                                                                                                                                                                                                                                                                                                                                                                                                                                                                                                                                                                                                                                                                           |  |  |  |
| <b>10) CONSORT: Who generated the random allocation sequence, who enrolled participants, and who assigned participants to interventions</b><br>"An independent team member who was not involved in the conduct of the trial, delivery of REsOluTioN program, or data analysis implemented the randomization and allocation...A team member who was involved in data analysis was blinded to the group allocation. However, participants were not blinded to group allocation due to the nature of the training."                                                                                                                                                                                                                                                                                                                                                                                                                                                                                                                                                                                                                                                                                                                                                                                                                                                                                                                                                                                                                                                                                                                                                                                                                                                                                                                 |  |  |  |
| <b>11a) CONSORT: Blinding - if done, who was blinded after assignment to interventions (for example, participants, care providers, those assessing outcomes) and how</b>                                                                                                                                                                                                                                                                                                                                                                                                                                                                                                                                                                                                                                                                                                                                                                                                                                                                                                                                                                                                                                                                                                                                                                                                                                                                                                                                                                                                                                                                                                                                                                                                                                                         |  |  |  |
| <b>11a-i) Specify who was blinded, and who wasn't</b><br>"A team member who was involved in data analysis was blinded to the group allocation. However, participants were not blinded to group allocation due to the nature of the training."                                                                                                                                                                                                                                                                                                                                                                                                                                                                                                                                                                                                                                                                                                                                                                                                                                                                                                                                                                                                                                                                                                                                                                                                                                                                                                                                                                                                                                                                                                                                                                                    |  |  |  |
| <b>11a-ii) Discuss e.g., whether participants knew which intervention was the "intervention of interest" and which one was the "comparator"</b>                                                                                                                                                                                                                                                                                                                                                                                                                                                                                                                                                                                                                                                                                                                                                                                                                                                                                                                                                                                                                                                                                                                                                                                                                                                                                                                                                                                                                                                                                                                                                                                                                                                                                  |  |  |  |

| <p><b>11b) CONSORT: If relevant, description of the similarity of interventions</b><br/>Not applicable as comparator group was wait list control.</p> <p><b>12a) CONSORT: Statistical methods used to compare groups for primary and secondary outcomes</b><br/>"Participants' demographic characteristics and acceptability outcomes (completers/non-completers) were descriptively analyzed. Depending on the normality of the data, resilience and psychological well-being measures were presented as means (SD) or medians (IQR). Intention-to-treat analysis was carried out to examine outcomes. Data from participants who withdrew from the study and who were lost to follow up (n=14, 13.1%) were imputed using the expectation maximization technique. We used ANOVA to evaluate any differences in resilience and psychological well-being between arms at 6 weeks. All analyses were undertaken in SPSS statistics software, version 22.0 (IBM Corp) [43], with a significance level set at 0.05."</p> <p><b>12a-i) Imputation techniques to deal with attrition / missing values</b><br/>"Data from participants who withdrew from the study and who were lost to follow up (n=14, 13.1%) were imputed using the expectation maximization technique."</p> <p><b>12b) CONSORT: Methods for additional analyses, such as subgroup analyses and adjusted analyses</b><br/>No additional statistical analyses were undertaken.</p> <p><b>RESULTS</b></p> <p><b>13a) CONSORT: For each group, the numbers of participants who were randomly assigned, received intended treatment, and were analysed for the primary outcome</b><br/>"Between August 2021 and May 2022, 134 nurses expressed an interest in participating in the study. Of 134, 108 completed the web-based consent process and prestudy survey. One participant was excluded on the basis of eligibility as he/she was a nursing student rather than an employed member of staff. Consented participants (n=107) were randomly assigned to the waitlist control (n=51) or REsOluTioN program (n=56). Nine participants withdrew from the REsOluTioN group prior to the intervention starting due to changing work commitments or annual leave requirements, which meant that they were unable to be allocated to a training cohort. At 6 weeks postenrollment, 93 participants had completed the poststudy survey, as 5 were lost to follow up and did not complete (2 in the waiting list group and 3 in the REsOluTioN group)."</p> <p><b>13b) CONSORT: For each group, losses and exclusions after randomisation, together with reasons</b><br/>This data is provided in the CONSORT flow diagram within the manuscript</p> <p><b>13b-i) Attrition diagram</b></p>                                                                                                                                                                                                                                                                                                                                                                                                                                                                                        |                 |               |               |                        |                        |                                       |     |    |    |    |                         |               |               |               |  |               |  |  |  |  |      |           |          |         |  |        |           |           |           |  |                  |  |  |  |  |       |           |           |           |  |       |         |         |         |  |       |         |         |         |  |       |         |         |         |  |                                     |               |               |               |  |                           |  |  |  |  |         |         |         |         |  |          |           |          |          |  |          |           |           |           |  |          |           |           |           |  |                |           |          |           |  |                             |  |  |  |  |                                      |           |           |           |  |           |         |         |         |  |           |         |         |         |  |                       |         |         |         |  |                       |  |  |  |  |          |             |             |             |  |         |             |             |             |  |                                     |  |  |  |  |          |              |              |              |  |         |              |              |              |  |  |  |
|-----------------------------------------------------------------------------------------------------------------------------------------------------------------------------------------------------------------------------------------------------------------------------------------------------------------------------------------------------------------------------------------------------------------------------------------------------------------------------------------------------------------------------------------------------------------------------------------------------------------------------------------------------------------------------------------------------------------------------------------------------------------------------------------------------------------------------------------------------------------------------------------------------------------------------------------------------------------------------------------------------------------------------------------------------------------------------------------------------------------------------------------------------------------------------------------------------------------------------------------------------------------------------------------------------------------------------------------------------------------------------------------------------------------------------------------------------------------------------------------------------------------------------------------------------------------------------------------------------------------------------------------------------------------------------------------------------------------------------------------------------------------------------------------------------------------------------------------------------------------------------------------------------------------------------------------------------------------------------------------------------------------------------------------------------------------------------------------------------------------------------------------------------------------------------------------------------------------------------------------------------------------------------------------------------------------------------------------------------------------------------------------------------------------------------------------------------------------------------------------------------------------------------------------------------------------------------------------------------------------------------------------------------------------------------------------------------------------------------------------------------------------------------------------------------------------------------------------------------------------------------------------------------------------------------------------------------------------------------------------------------------------------------------------------------------------------------------------------------------------------------------------------------------------------------------------------------------------------------------------|-----------------|---------------|---------------|------------------------|------------------------|---------------------------------------|-----|----|----|----|-------------------------|---------------|---------------|---------------|--|---------------|--|--|--|--|------|-----------|----------|---------|--|--------|-----------|-----------|-----------|--|------------------|--|--|--|--|-------|-----------|-----------|-----------|--|-------|---------|---------|---------|--|-------|---------|---------|---------|--|-------|---------|---------|---------|--|-------------------------------------|---------------|---------------|---------------|--|---------------------------|--|--|--|--|---------|---------|---------|---------|--|----------|-----------|----------|----------|--|----------|-----------|-----------|-----------|--|----------|-----------|-----------|-----------|--|----------------|-----------|----------|-----------|--|-----------------------------|--|--|--|--|--------------------------------------|-----------|-----------|-----------|--|-----------|---------|---------|---------|--|-----------|---------|---------|---------|--|-----------------------|---------|---------|---------|--|-----------------------|--|--|--|--|----------|-------------|-------------|-------------|--|---------|-------------|-------------|-------------|--|-------------------------------------|--|--|--|--|----------|--------------|--------------|--------------|--|---------|--------------|--------------|--------------|--|--|--|
| <p><b>14a) CONSORT: Dates defining the periods of recruitment and follow-up</b><br/>"We carried out a pilot randomized trial (1:1), conducted at a single site (mental health and community trust in South England) between August 2021 and May 2022."</p> <p><b>14a-i) Indicate if critical "secular events" fell into the study period</b></p>                                                                                                                                                                                                                                                                                                                                                                                                                                                                                                                                                                                                                                                                                                                                                                                                                                                                                                                                                                                                                                                                                                                                                                                                                                                                                                                                                                                                                                                                                                                                                                                                                                                                                                                                                                                                                                                                                                                                                                                                                                                                                                                                                                                                                                                                                                                                                                                                                                                                                                                                                                                                                                                                                                                                                                                                                                                                                        |                 |               |               |                        |                        |                                       |     |    |    |    |                         |               |               |               |  |               |  |  |  |  |      |           |          |         |  |        |           |           |           |  |                  |  |  |  |  |       |           |           |           |  |       |         |         |         |  |       |         |         |         |  |       |         |         |         |  |                                     |               |               |               |  |                           |  |  |  |  |         |         |         |         |  |          |           |          |          |  |          |           |           |           |  |          |           |           |           |  |                |           |          |           |  |                             |  |  |  |  |                                      |           |           |           |  |           |         |         |         |  |           |         |         |         |  |                       |         |         |         |  |                       |  |  |  |  |          |             |             |             |  |         |             |             |             |  |                                     |  |  |  |  |          |              |              |              |  |         |              |              |              |  |  |  |
| <p><b>14b) CONSORT: Why the trial ended or was stopped (early)</b><br/>The trial was not ended/did not stop early.</p> <p><b>15) CONSORT: A table showing baseline demographic and clinical characteristics for each group</b></p> <table border="1"> <thead> <tr> <th>Characteristics</th> <th>Total</th> <th>REsOluTioN</th> <th>Na group</th> <th>Waitlist control group</th> </tr> </thead> <tbody> <tr> <td>Number of participants randomized (n)</td> <td>107</td> <td>56</td> <td>51</td> <td>56</td> </tr> <tr> <td>Age in years, mean (SD)</td> <td>43.78 (10.85)</td> <td>44.04 (10.72)</td> <td>43.49 (11.08)</td> <td></td> </tr> <tr> <td>Gender, n (%)</td> <td></td> <td></td> <td></td> <td></td> </tr> <tr> <td>Male</td> <td>12 (11.2)</td> <td>7 (12.5)</td> <td>5 (9.8)</td> <td></td> </tr> <tr> <td>Female</td> <td>95 (88.8)</td> <td>49 (87.5)</td> <td>46 (90.2)</td> <td></td> </tr> <tr> <td>Ethnicity, n (%)</td> <td></td> <td></td> <td></td> <td></td> </tr> <tr> <td>White</td> <td>95 (88.8)</td> <td>52 (92.9)</td> <td>43 (84.3)</td> <td></td> </tr> <tr> <td>Asian</td> <td>3 (2.8)</td> <td>0 (0.0)</td> <td>3 (5.9)</td> <td></td> </tr> <tr> <td>Black</td> <td>7 (6.5)</td> <td>2 (3.6)</td> <td>5 (9.8)</td> <td></td> </tr> <tr> <td>Mixed</td> <td>2 (1.9)</td> <td>2 (3.6)</td> <td>0 (0.0)</td> <td></td> </tr> <tr> <td>Work experience in years, mean (SD)</td> <td>15.75 (11.58)</td> <td>14.88 (11.28)</td> <td>16.71 (11.94)</td> <td></td> </tr> <tr> <td>Level of NHS bands, n (%)</td> <td></td> <td></td> <td></td> <td></td> </tr> <tr> <td>Band 45</td> <td>4 (4.7)</td> <td>4 (7.1)</td> <td>1 (2.0)</td> <td></td> </tr> <tr> <td>Band 516</td> <td>15 (15.0)</td> <td>7 (12.5)</td> <td>9 (17.6)</td> <td></td> </tr> <tr> <td>Band 647</td> <td>43 (43.9)</td> <td>26 (46.4)</td> <td>21 (41.2)</td> <td></td> </tr> <tr> <td>Band 721</td> <td>19 (19.6)</td> <td>11 (19.6)</td> <td>10 (19.6)</td> <td></td> </tr> <tr> <td>Band 8 (a,b,c)</td> <td>18 (16.8)</td> <td>8 (16.8)</td> <td>10 (19.6)</td> <td></td> </tr> <tr> <td>Type of work setting, n (%)</td> <td></td> <td></td> <td></td> <td></td> </tr> <tr> <td>Community and mental health services</td> <td>91 (85.0)</td> <td>46 (82.1)</td> <td>45 (88.2)</td> <td></td> </tr> <tr> <td>Forensics</td> <td>4 (3.7)</td> <td>3 (5.4)</td> <td>1 (2.0)</td> <td></td> </tr> <tr> <td>Corporate</td> <td>6 (5.6)</td> <td>2 (3.6)</td> <td>4 (7.8)</td> <td></td> </tr> <tr> <td>Learning disabilities</td> <td>6 (5.6)</td> <td>5 (8.9)</td> <td>1 (2.0)</td> <td></td> </tr> <tr> <td>Resilience, mean (SD)</td> <td></td> <td></td> <td></td> <td></td> </tr> <tr> <td>Baseline</td> <td>3.02 (0.27)</td> <td>3.01 (0.25)</td> <td>3.04 (0.28)</td> <td></td> </tr> <tr> <td>6 weeks</td> <td>3.02 (0.26)</td> <td>3.02 (0.25)</td> <td>3.02 (0.26)</td> <td></td> </tr> <tr> <td>Psychological well-being, mean (SD)</td> <td></td> <td></td> <td></td> <td></td> </tr> <tr> <td>Baseline</td> <td>46.35 (7.52)</td> <td>46.73 (8.32)</td> <td>45.92 (6.59)</td> <td></td> </tr> <tr> <td>6 weeks</td> <td>47.56 (9.26)</td> <td>48.55 (9.64)</td> <td>46.47 (8.78)</td> <td></td> </tr> </tbody> </table> | Characteristics | Total         | REsOluTioN    | Na group               | Waitlist control group | Number of participants randomized (n) | 107 | 56 | 51 | 56 | Age in years, mean (SD) | 43.78 (10.85) | 44.04 (10.72) | 43.49 (11.08) |  | Gender, n (%) |  |  |  |  | Male | 12 (11.2) | 7 (12.5) | 5 (9.8) |  | Female | 95 (88.8) | 49 (87.5) | 46 (90.2) |  | Ethnicity, n (%) |  |  |  |  | White | 95 (88.8) | 52 (92.9) | 43 (84.3) |  | Asian | 3 (2.8) | 0 (0.0) | 3 (5.9) |  | Black | 7 (6.5) | 2 (3.6) | 5 (9.8) |  | Mixed | 2 (1.9) | 2 (3.6) | 0 (0.0) |  | Work experience in years, mean (SD) | 15.75 (11.58) | 14.88 (11.28) | 16.71 (11.94) |  | Level of NHS bands, n (%) |  |  |  |  | Band 45 | 4 (4.7) | 4 (7.1) | 1 (2.0) |  | Band 516 | 15 (15.0) | 7 (12.5) | 9 (17.6) |  | Band 647 | 43 (43.9) | 26 (46.4) | 21 (41.2) |  | Band 721 | 19 (19.6) | 11 (19.6) | 10 (19.6) |  | Band 8 (a,b,c) | 18 (16.8) | 8 (16.8) | 10 (19.6) |  | Type of work setting, n (%) |  |  |  |  | Community and mental health services | 91 (85.0) | 46 (82.1) | 45 (88.2) |  | Forensics | 4 (3.7) | 3 (5.4) | 1 (2.0) |  | Corporate | 6 (5.6) | 2 (3.6) | 4 (7.8) |  | Learning disabilities | 6 (5.6) | 5 (8.9) | 1 (2.0) |  | Resilience, mean (SD) |  |  |  |  | Baseline | 3.02 (0.27) | 3.01 (0.25) | 3.04 (0.28) |  | 6 weeks | 3.02 (0.26) | 3.02 (0.25) | 3.02 (0.26) |  | Psychological well-being, mean (SD) |  |  |  |  | Baseline | 46.35 (7.52) | 46.73 (8.32) | 45.92 (6.59) |  | 6 weeks | 47.56 (9.26) | 48.55 (9.64) | 46.47 (8.78) |  |  |  |
| Characteristics                                                                                                                                                                                                                                                                                                                                                                                                                                                                                                                                                                                                                                                                                                                                                                                                                                                                                                                                                                                                                                                                                                                                                                                                                                                                                                                                                                                                                                                                                                                                                                                                                                                                                                                                                                                                                                                                                                                                                                                                                                                                                                                                                                                                                                                                                                                                                                                                                                                                                                                                                                                                                                                                                                                                                                                                                                                                                                                                                                                                                                                                                                                                                                                                                         | Total           | REsOluTioN    | Na group      | Waitlist control group |                        |                                       |     |    |    |    |                         |               |               |               |  |               |  |  |  |  |      |           |          |         |  |        |           |           |           |  |                  |  |  |  |  |       |           |           |           |  |       |         |         |         |  |       |         |         |         |  |       |         |         |         |  |                                     |               |               |               |  |                           |  |  |  |  |         |         |         |         |  |          |           |          |          |  |          |           |           |           |  |          |           |           |           |  |                |           |          |           |  |                             |  |  |  |  |                                      |           |           |           |  |           |         |         |         |  |           |         |         |         |  |                       |         |         |         |  |                       |  |  |  |  |          |             |             |             |  |         |             |             |             |  |                                     |  |  |  |  |          |              |              |              |  |         |              |              |              |  |  |  |
| Number of participants randomized (n)                                                                                                                                                                                                                                                                                                                                                                                                                                                                                                                                                                                                                                                                                                                                                                                                                                                                                                                                                                                                                                                                                                                                                                                                                                                                                                                                                                                                                                                                                                                                                                                                                                                                                                                                                                                                                                                                                                                                                                                                                                                                                                                                                                                                                                                                                                                                                                                                                                                                                                                                                                                                                                                                                                                                                                                                                                                                                                                                                                                                                                                                                                                                                                                                   | 107             | 56            | 51            | 56                     |                        |                                       |     |    |    |    |                         |               |               |               |  |               |  |  |  |  |      |           |          |         |  |        |           |           |           |  |                  |  |  |  |  |       |           |           |           |  |       |         |         |         |  |       |         |         |         |  |       |         |         |         |  |                                     |               |               |               |  |                           |  |  |  |  |         |         |         |         |  |          |           |          |          |  |          |           |           |           |  |          |           |           |           |  |                |           |          |           |  |                             |  |  |  |  |                                      |           |           |           |  |           |         |         |         |  |           |         |         |         |  |                       |         |         |         |  |                       |  |  |  |  |          |             |             |             |  |         |             |             |             |  |                                     |  |  |  |  |          |              |              |              |  |         |              |              |              |  |  |  |
| Age in years, mean (SD)                                                                                                                                                                                                                                                                                                                                                                                                                                                                                                                                                                                                                                                                                                                                                                                                                                                                                                                                                                                                                                                                                                                                                                                                                                                                                                                                                                                                                                                                                                                                                                                                                                                                                                                                                                                                                                                                                                                                                                                                                                                                                                                                                                                                                                                                                                                                                                                                                                                                                                                                                                                                                                                                                                                                                                                                                                                                                                                                                                                                                                                                                                                                                                                                                 | 43.78 (10.85)   | 44.04 (10.72) | 43.49 (11.08) |                        |                        |                                       |     |    |    |    |                         |               |               |               |  |               |  |  |  |  |      |           |          |         |  |        |           |           |           |  |                  |  |  |  |  |       |           |           |           |  |       |         |         |         |  |       |         |         |         |  |       |         |         |         |  |                                     |               |               |               |  |                           |  |  |  |  |         |         |         |         |  |          |           |          |          |  |          |           |           |           |  |          |           |           |           |  |                |           |          |           |  |                             |  |  |  |  |                                      |           |           |           |  |           |         |         |         |  |           |         |         |         |  |                       |         |         |         |  |                       |  |  |  |  |          |             |             |             |  |         |             |             |             |  |                                     |  |  |  |  |          |              |              |              |  |         |              |              |              |  |  |  |
| Gender, n (%)                                                                                                                                                                                                                                                                                                                                                                                                                                                                                                                                                                                                                                                                                                                                                                                                                                                                                                                                                                                                                                                                                                                                                                                                                                                                                                                                                                                                                                                                                                                                                                                                                                                                                                                                                                                                                                                                                                                                                                                                                                                                                                                                                                                                                                                                                                                                                                                                                                                                                                                                                                                                                                                                                                                                                                                                                                                                                                                                                                                                                                                                                                                                                                                                                           |                 |               |               |                        |                        |                                       |     |    |    |    |                         |               |               |               |  |               |  |  |  |  |      |           |          |         |  |        |           |           |           |  |                  |  |  |  |  |       |           |           |           |  |       |         |         |         |  |       |         |         |         |  |       |         |         |         |  |                                     |               |               |               |  |                           |  |  |  |  |         |         |         |         |  |          |           |          |          |  |          |           |           |           |  |          |           |           |           |  |                |           |          |           |  |                             |  |  |  |  |                                      |           |           |           |  |           |         |         |         |  |           |         |         |         |  |                       |         |         |         |  |                       |  |  |  |  |          |             |             |             |  |         |             |             |             |  |                                     |  |  |  |  |          |              |              |              |  |         |              |              |              |  |  |  |
| Male                                                                                                                                                                                                                                                                                                                                                                                                                                                                                                                                                                                                                                                                                                                                                                                                                                                                                                                                                                                                                                                                                                                                                                                                                                                                                                                                                                                                                                                                                                                                                                                                                                                                                                                                                                                                                                                                                                                                                                                                                                                                                                                                                                                                                                                                                                                                                                                                                                                                                                                                                                                                                                                                                                                                                                                                                                                                                                                                                                                                                                                                                                                                                                                                                                    | 12 (11.2)       | 7 (12.5)      | 5 (9.8)       |                        |                        |                                       |     |    |    |    |                         |               |               |               |  |               |  |  |  |  |      |           |          |         |  |        |           |           |           |  |                  |  |  |  |  |       |           |           |           |  |       |         |         |         |  |       |         |         |         |  |       |         |         |         |  |                                     |               |               |               |  |                           |  |  |  |  |         |         |         |         |  |          |           |          |          |  |          |           |           |           |  |          |           |           |           |  |                |           |          |           |  |                             |  |  |  |  |                                      |           |           |           |  |           |         |         |         |  |           |         |         |         |  |                       |         |         |         |  |                       |  |  |  |  |          |             |             |             |  |         |             |             |             |  |                                     |  |  |  |  |          |              |              |              |  |         |              |              |              |  |  |  |
| Female                                                                                                                                                                                                                                                                                                                                                                                                                                                                                                                                                                                                                                                                                                                                                                                                                                                                                                                                                                                                                                                                                                                                                                                                                                                                                                                                                                                                                                                                                                                                                                                                                                                                                                                                                                                                                                                                                                                                                                                                                                                                                                                                                                                                                                                                                                                                                                                                                                                                                                                                                                                                                                                                                                                                                                                                                                                                                                                                                                                                                                                                                                                                                                                                                                  | 95 (88.8)       | 49 (87.5)     | 46 (90.2)     |                        |                        |                                       |     |    |    |    |                         |               |               |               |  |               |  |  |  |  |      |           |          |         |  |        |           |           |           |  |                  |  |  |  |  |       |           |           |           |  |       |         |         |         |  |       |         |         |         |  |       |         |         |         |  |                                     |               |               |               |  |                           |  |  |  |  |         |         |         |         |  |          |           |          |          |  |          |           |           |           |  |          |           |           |           |  |                |           |          |           |  |                             |  |  |  |  |                                      |           |           |           |  |           |         |         |         |  |           |         |         |         |  |                       |         |         |         |  |                       |  |  |  |  |          |             |             |             |  |         |             |             |             |  |                                     |  |  |  |  |          |              |              |              |  |         |              |              |              |  |  |  |
| Ethnicity, n (%)                                                                                                                                                                                                                                                                                                                                                                                                                                                                                                                                                                                                                                                                                                                                                                                                                                                                                                                                                                                                                                                                                                                                                                                                                                                                                                                                                                                                                                                                                                                                                                                                                                                                                                                                                                                                                                                                                                                                                                                                                                                                                                                                                                                                                                                                                                                                                                                                                                                                                                                                                                                                                                                                                                                                                                                                                                                                                                                                                                                                                                                                                                                                                                                                                        |                 |               |               |                        |                        |                                       |     |    |    |    |                         |               |               |               |  |               |  |  |  |  |      |           |          |         |  |        |           |           |           |  |                  |  |  |  |  |       |           |           |           |  |       |         |         |         |  |       |         |         |         |  |       |         |         |         |  |                                     |               |               |               |  |                           |  |  |  |  |         |         |         |         |  |          |           |          |          |  |          |           |           |           |  |          |           |           |           |  |                |           |          |           |  |                             |  |  |  |  |                                      |           |           |           |  |           |         |         |         |  |           |         |         |         |  |                       |         |         |         |  |                       |  |  |  |  |          |             |             |             |  |         |             |             |             |  |                                     |  |  |  |  |          |              |              |              |  |         |              |              |              |  |  |  |
| White                                                                                                                                                                                                                                                                                                                                                                                                                                                                                                                                                                                                                                                                                                                                                                                                                                                                                                                                                                                                                                                                                                                                                                                                                                                                                                                                                                                                                                                                                                                                                                                                                                                                                                                                                                                                                                                                                                                                                                                                                                                                                                                                                                                                                                                                                                                                                                                                                                                                                                                                                                                                                                                                                                                                                                                                                                                                                                                                                                                                                                                                                                                                                                                                                                   | 95 (88.8)       | 52 (92.9)     | 43 (84.3)     |                        |                        |                                       |     |    |    |    |                         |               |               |               |  |               |  |  |  |  |      |           |          |         |  |        |           |           |           |  |                  |  |  |  |  |       |           |           |           |  |       |         |         |         |  |       |         |         |         |  |       |         |         |         |  |                                     |               |               |               |  |                           |  |  |  |  |         |         |         |         |  |          |           |          |          |  |          |           |           |           |  |          |           |           |           |  |                |           |          |           |  |                             |  |  |  |  |                                      |           |           |           |  |           |         |         |         |  |           |         |         |         |  |                       |         |         |         |  |                       |  |  |  |  |          |             |             |             |  |         |             |             |             |  |                                     |  |  |  |  |          |              |              |              |  |         |              |              |              |  |  |  |
| Asian                                                                                                                                                                                                                                                                                                                                                                                                                                                                                                                                                                                                                                                                                                                                                                                                                                                                                                                                                                                                                                                                                                                                                                                                                                                                                                                                                                                                                                                                                                                                                                                                                                                                                                                                                                                                                                                                                                                                                                                                                                                                                                                                                                                                                                                                                                                                                                                                                                                                                                                                                                                                                                                                                                                                                                                                                                                                                                                                                                                                                                                                                                                                                                                                                                   | 3 (2.8)         | 0 (0.0)       | 3 (5.9)       |                        |                        |                                       |     |    |    |    |                         |               |               |               |  |               |  |  |  |  |      |           |          |         |  |        |           |           |           |  |                  |  |  |  |  |       |           |           |           |  |       |         |         |         |  |       |         |         |         |  |       |         |         |         |  |                                     |               |               |               |  |                           |  |  |  |  |         |         |         |         |  |          |           |          |          |  |          |           |           |           |  |          |           |           |           |  |                |           |          |           |  |                             |  |  |  |  |                                      |           |           |           |  |           |         |         |         |  |           |         |         |         |  |                       |         |         |         |  |                       |  |  |  |  |          |             |             |             |  |         |             |             |             |  |                                     |  |  |  |  |          |              |              |              |  |         |              |              |              |  |  |  |
| Black                                                                                                                                                                                                                                                                                                                                                                                                                                                                                                                                                                                                                                                                                                                                                                                                                                                                                                                                                                                                                                                                                                                                                                                                                                                                                                                                                                                                                                                                                                                                                                                                                                                                                                                                                                                                                                                                                                                                                                                                                                                                                                                                                                                                                                                                                                                                                                                                                                                                                                                                                                                                                                                                                                                                                                                                                                                                                                                                                                                                                                                                                                                                                                                                                                   | 7 (6.5)         | 2 (3.6)       | 5 (9.8)       |                        |                        |                                       |     |    |    |    |                         |               |               |               |  |               |  |  |  |  |      |           |          |         |  |        |           |           |           |  |                  |  |  |  |  |       |           |           |           |  |       |         |         |         |  |       |         |         |         |  |       |         |         |         |  |                                     |               |               |               |  |                           |  |  |  |  |         |         |         |         |  |          |           |          |          |  |          |           |           |           |  |          |           |           |           |  |                |           |          |           |  |                             |  |  |  |  |                                      |           |           |           |  |           |         |         |         |  |           |         |         |         |  |                       |         |         |         |  |                       |  |  |  |  |          |             |             |             |  |         |             |             |             |  |                                     |  |  |  |  |          |              |              |              |  |         |              |              |              |  |  |  |
| Mixed                                                                                                                                                                                                                                                                                                                                                                                                                                                                                                                                                                                                                                                                                                                                                                                                                                                                                                                                                                                                                                                                                                                                                                                                                                                                                                                                                                                                                                                                                                                                                                                                                                                                                                                                                                                                                                                                                                                                                                                                                                                                                                                                                                                                                                                                                                                                                                                                                                                                                                                                                                                                                                                                                                                                                                                                                                                                                                                                                                                                                                                                                                                                                                                                                                   | 2 (1.9)         | 2 (3.6)       | 0 (0.0)       |                        |                        |                                       |     |    |    |    |                         |               |               |               |  |               |  |  |  |  |      |           |          |         |  |        |           |           |           |  |                  |  |  |  |  |       |           |           |           |  |       |         |         |         |  |       |         |         |         |  |       |         |         |         |  |                                     |               |               |               |  |                           |  |  |  |  |         |         |         |         |  |          |           |          |          |  |          |           |           |           |  |          |           |           |           |  |                |           |          |           |  |                             |  |  |  |  |                                      |           |           |           |  |           |         |         |         |  |           |         |         |         |  |                       |         |         |         |  |                       |  |  |  |  |          |             |             |             |  |         |             |             |             |  |                                     |  |  |  |  |          |              |              |              |  |         |              |              |              |  |  |  |
| Work experience in years, mean (SD)                                                                                                                                                                                                                                                                                                                                                                                                                                                                                                                                                                                                                                                                                                                                                                                                                                                                                                                                                                                                                                                                                                                                                                                                                                                                                                                                                                                                                                                                                                                                                                                                                                                                                                                                                                                                                                                                                                                                                                                                                                                                                                                                                                                                                                                                                                                                                                                                                                                                                                                                                                                                                                                                                                                                                                                                                                                                                                                                                                                                                                                                                                                                                                                                     | 15.75 (11.58)   | 14.88 (11.28) | 16.71 (11.94) |                        |                        |                                       |     |    |    |    |                         |               |               |               |  |               |  |  |  |  |      |           |          |         |  |        |           |           |           |  |                  |  |  |  |  |       |           |           |           |  |       |         |         |         |  |       |         |         |         |  |       |         |         |         |  |                                     |               |               |               |  |                           |  |  |  |  |         |         |         |         |  |          |           |          |          |  |          |           |           |           |  |          |           |           |           |  |                |           |          |           |  |                             |  |  |  |  |                                      |           |           |           |  |           |         |         |         |  |           |         |         |         |  |                       |         |         |         |  |                       |  |  |  |  |          |             |             |             |  |         |             |             |             |  |                                     |  |  |  |  |          |              |              |              |  |         |              |              |              |  |  |  |
| Level of NHS bands, n (%)                                                                                                                                                                                                                                                                                                                                                                                                                                                                                                                                                                                                                                                                                                                                                                                                                                                                                                                                                                                                                                                                                                                                                                                                                                                                                                                                                                                                                                                                                                                                                                                                                                                                                                                                                                                                                                                                                                                                                                                                                                                                                                                                                                                                                                                                                                                                                                                                                                                                                                                                                                                                                                                                                                                                                                                                                                                                                                                                                                                                                                                                                                                                                                                                               |                 |               |               |                        |                        |                                       |     |    |    |    |                         |               |               |               |  |               |  |  |  |  |      |           |          |         |  |        |           |           |           |  |                  |  |  |  |  |       |           |           |           |  |       |         |         |         |  |       |         |         |         |  |       |         |         |         |  |                                     |               |               |               |  |                           |  |  |  |  |         |         |         |         |  |          |           |          |          |  |          |           |           |           |  |          |           |           |           |  |                |           |          |           |  |                             |  |  |  |  |                                      |           |           |           |  |           |         |         |         |  |           |         |         |         |  |                       |         |         |         |  |                       |  |  |  |  |          |             |             |             |  |         |             |             |             |  |                                     |  |  |  |  |          |              |              |              |  |         |              |              |              |  |  |  |
| Band 45                                                                                                                                                                                                                                                                                                                                                                                                                                                                                                                                                                                                                                                                                                                                                                                                                                                                                                                                                                                                                                                                                                                                                                                                                                                                                                                                                                                                                                                                                                                                                                                                                                                                                                                                                                                                                                                                                                                                                                                                                                                                                                                                                                                                                                                                                                                                                                                                                                                                                                                                                                                                                                                                                                                                                                                                                                                                                                                                                                                                                                                                                                                                                                                                                                 | 4 (4.7)         | 4 (7.1)       | 1 (2.0)       |                        |                        |                                       |     |    |    |    |                         |               |               |               |  |               |  |  |  |  |      |           |          |         |  |        |           |           |           |  |                  |  |  |  |  |       |           |           |           |  |       |         |         |         |  |       |         |         |         |  |       |         |         |         |  |                                     |               |               |               |  |                           |  |  |  |  |         |         |         |         |  |          |           |          |          |  |          |           |           |           |  |          |           |           |           |  |                |           |          |           |  |                             |  |  |  |  |                                      |           |           |           |  |           |         |         |         |  |           |         |         |         |  |                       |         |         |         |  |                       |  |  |  |  |          |             |             |             |  |         |             |             |             |  |                                     |  |  |  |  |          |              |              |              |  |         |              |              |              |  |  |  |
| Band 516                                                                                                                                                                                                                                                                                                                                                                                                                                                                                                                                                                                                                                                                                                                                                                                                                                                                                                                                                                                                                                                                                                                                                                                                                                                                                                                                                                                                                                                                                                                                                                                                                                                                                                                                                                                                                                                                                                                                                                                                                                                                                                                                                                                                                                                                                                                                                                                                                                                                                                                                                                                                                                                                                                                                                                                                                                                                                                                                                                                                                                                                                                                                                                                                                                | 15 (15.0)       | 7 (12.5)      | 9 (17.6)      |                        |                        |                                       |     |    |    |    |                         |               |               |               |  |               |  |  |  |  |      |           |          |         |  |        |           |           |           |  |                  |  |  |  |  |       |           |           |           |  |       |         |         |         |  |       |         |         |         |  |       |         |         |         |  |                                     |               |               |               |  |                           |  |  |  |  |         |         |         |         |  |          |           |          |          |  |          |           |           |           |  |          |           |           |           |  |                |           |          |           |  |                             |  |  |  |  |                                      |           |           |           |  |           |         |         |         |  |           |         |         |         |  |                       |         |         |         |  |                       |  |  |  |  |          |             |             |             |  |         |             |             |             |  |                                     |  |  |  |  |          |              |              |              |  |         |              |              |              |  |  |  |
| Band 647                                                                                                                                                                                                                                                                                                                                                                                                                                                                                                                                                                                                                                                                                                                                                                                                                                                                                                                                                                                                                                                                                                                                                                                                                                                                                                                                                                                                                                                                                                                                                                                                                                                                                                                                                                                                                                                                                                                                                                                                                                                                                                                                                                                                                                                                                                                                                                                                                                                                                                                                                                                                                                                                                                                                                                                                                                                                                                                                                                                                                                                                                                                                                                                                                                | 43 (43.9)       | 26 (46.4)     | 21 (41.2)     |                        |                        |                                       |     |    |    |    |                         |               |               |               |  |               |  |  |  |  |      |           |          |         |  |        |           |           |           |  |                  |  |  |  |  |       |           |           |           |  |       |         |         |         |  |       |         |         |         |  |       |         |         |         |  |                                     |               |               |               |  |                           |  |  |  |  |         |         |         |         |  |          |           |          |          |  |          |           |           |           |  |          |           |           |           |  |                |           |          |           |  |                             |  |  |  |  |                                      |           |           |           |  |           |         |         |         |  |           |         |         |         |  |                       |         |         |         |  |                       |  |  |  |  |          |             |             |             |  |         |             |             |             |  |                                     |  |  |  |  |          |              |              |              |  |         |              |              |              |  |  |  |
| Band 721                                                                                                                                                                                                                                                                                                                                                                                                                                                                                                                                                                                                                                                                                                                                                                                                                                                                                                                                                                                                                                                                                                                                                                                                                                                                                                                                                                                                                                                                                                                                                                                                                                                                                                                                                                                                                                                                                                                                                                                                                                                                                                                                                                                                                                                                                                                                                                                                                                                                                                                                                                                                                                                                                                                                                                                                                                                                                                                                                                                                                                                                                                                                                                                                                                | 19 (19.6)       | 11 (19.6)     | 10 (19.6)     |                        |                        |                                       |     |    |    |    |                         |               |               |               |  |               |  |  |  |  |      |           |          |         |  |        |           |           |           |  |                  |  |  |  |  |       |           |           |           |  |       |         |         |         |  |       |         |         |         |  |       |         |         |         |  |                                     |               |               |               |  |                           |  |  |  |  |         |         |         |         |  |          |           |          |          |  |          |           |           |           |  |          |           |           |           |  |                |           |          |           |  |                             |  |  |  |  |                                      |           |           |           |  |           |         |         |         |  |           |         |         |         |  |                       |         |         |         |  |                       |  |  |  |  |          |             |             |             |  |         |             |             |             |  |                                     |  |  |  |  |          |              |              |              |  |         |              |              |              |  |  |  |
| Band 8 (a,b,c)                                                                                                                                                                                                                                                                                                                                                                                                                                                                                                                                                                                                                                                                                                                                                                                                                                                                                                                                                                                                                                                                                                                                                                                                                                                                                                                                                                                                                                                                                                                                                                                                                                                                                                                                                                                                                                                                                                                                                                                                                                                                                                                                                                                                                                                                                                                                                                                                                                                                                                                                                                                                                                                                                                                                                                                                                                                                                                                                                                                                                                                                                                                                                                                                                          | 18 (16.8)       | 8 (16.8)      | 10 (19.6)     |                        |                        |                                       |     |    |    |    |                         |               |               |               |  |               |  |  |  |  |      |           |          |         |  |        |           |           |           |  |                  |  |  |  |  |       |           |           |           |  |       |         |         |         |  |       |         |         |         |  |       |         |         |         |  |                                     |               |               |               |  |                           |  |  |  |  |         |         |         |         |  |          |           |          |          |  |          |           |           |           |  |          |           |           |           |  |                |           |          |           |  |                             |  |  |  |  |                                      |           |           |           |  |           |         |         |         |  |           |         |         |         |  |                       |         |         |         |  |                       |  |  |  |  |          |             |             |             |  |         |             |             |             |  |                                     |  |  |  |  |          |              |              |              |  |         |              |              |              |  |  |  |
| Type of work setting, n (%)                                                                                                                                                                                                                                                                                                                                                                                                                                                                                                                                                                                                                                                                                                                                                                                                                                                                                                                                                                                                                                                                                                                                                                                                                                                                                                                                                                                                                                                                                                                                                                                                                                                                                                                                                                                                                                                                                                                                                                                                                                                                                                                                                                                                                                                                                                                                                                                                                                                                                                                                                                                                                                                                                                                                                                                                                                                                                                                                                                                                                                                                                                                                                                                                             |                 |               |               |                        |                        |                                       |     |    |    |    |                         |               |               |               |  |               |  |  |  |  |      |           |          |         |  |        |           |           |           |  |                  |  |  |  |  |       |           |           |           |  |       |         |         |         |  |       |         |         |         |  |       |         |         |         |  |                                     |               |               |               |  |                           |  |  |  |  |         |         |         |         |  |          |           |          |          |  |          |           |           |           |  |          |           |           |           |  |                |           |          |           |  |                             |  |  |  |  |                                      |           |           |           |  |           |         |         |         |  |           |         |         |         |  |                       |         |         |         |  |                       |  |  |  |  |          |             |             |             |  |         |             |             |             |  |                                     |  |  |  |  |          |              |              |              |  |         |              |              |              |  |  |  |
| Community and mental health services                                                                                                                                                                                                                                                                                                                                                                                                                                                                                                                                                                                                                                                                                                                                                                                                                                                                                                                                                                                                                                                                                                                                                                                                                                                                                                                                                                                                                                                                                                                                                                                                                                                                                                                                                                                                                                                                                                                                                                                                                                                                                                                                                                                                                                                                                                                                                                                                                                                                                                                                                                                                                                                                                                                                                                                                                                                                                                                                                                                                                                                                                                                                                                                                    | 91 (85.0)       | 46 (82.1)     | 45 (88.2)     |                        |                        |                                       |     |    |    |    |                         |               |               |               |  |               |  |  |  |  |      |           |          |         |  |        |           |           |           |  |                  |  |  |  |  |       |           |           |           |  |       |         |         |         |  |       |         |         |         |  |       |         |         |         |  |                                     |               |               |               |  |                           |  |  |  |  |         |         |         |         |  |          |           |          |          |  |          |           |           |           |  |          |           |           |           |  |                |           |          |           |  |                             |  |  |  |  |                                      |           |           |           |  |           |         |         |         |  |           |         |         |         |  |                       |         |         |         |  |                       |  |  |  |  |          |             |             |             |  |         |             |             |             |  |                                     |  |  |  |  |          |              |              |              |  |         |              |              |              |  |  |  |
| Forensics                                                                                                                                                                                                                                                                                                                                                                                                                                                                                                                                                                                                                                                                                                                                                                                                                                                                                                                                                                                                                                                                                                                                                                                                                                                                                                                                                                                                                                                                                                                                                                                                                                                                                                                                                                                                                                                                                                                                                                                                                                                                                                                                                                                                                                                                                                                                                                                                                                                                                                                                                                                                                                                                                                                                                                                                                                                                                                                                                                                                                                                                                                                                                                                                                               | 4 (3.7)         | 3 (5.4)       | 1 (2.0)       |                        |                        |                                       |     |    |    |    |                         |               |               |               |  |               |  |  |  |  |      |           |          |         |  |        |           |           |           |  |                  |  |  |  |  |       |           |           |           |  |       |         |         |         |  |       |         |         |         |  |       |         |         |         |  |                                     |               |               |               |  |                           |  |  |  |  |         |         |         |         |  |          |           |          |          |  |          |           |           |           |  |          |           |           |           |  |                |           |          |           |  |                             |  |  |  |  |                                      |           |           |           |  |           |         |         |         |  |           |         |         |         |  |                       |         |         |         |  |                       |  |  |  |  |          |             |             |             |  |         |             |             |             |  |                                     |  |  |  |  |          |              |              |              |  |         |              |              |              |  |  |  |
| Corporate                                                                                                                                                                                                                                                                                                                                                                                                                                                                                                                                                                                                                                                                                                                                                                                                                                                                                                                                                                                                                                                                                                                                                                                                                                                                                                                                                                                                                                                                                                                                                                                                                                                                                                                                                                                                                                                                                                                                                                                                                                                                                                                                                                                                                                                                                                                                                                                                                                                                                                                                                                                                                                                                                                                                                                                                                                                                                                                                                                                                                                                                                                                                                                                                                               | 6 (5.6)         | 2 (3.6)       | 4 (7.8)       |                        |                        |                                       |     |    |    |    |                         |               |               |               |  |               |  |  |  |  |      |           |          |         |  |        |           |           |           |  |                  |  |  |  |  |       |           |           |           |  |       |         |         |         |  |       |         |         |         |  |       |         |         |         |  |                                     |               |               |               |  |                           |  |  |  |  |         |         |         |         |  |          |           |          |          |  |          |           |           |           |  |          |           |           |           |  |                |           |          |           |  |                             |  |  |  |  |                                      |           |           |           |  |           |         |         |         |  |           |         |         |         |  |                       |         |         |         |  |                       |  |  |  |  |          |             |             |             |  |         |             |             |             |  |                                     |  |  |  |  |          |              |              |              |  |         |              |              |              |  |  |  |
| Learning disabilities                                                                                                                                                                                                                                                                                                                                                                                                                                                                                                                                                                                                                                                                                                                                                                                                                                                                                                                                                                                                                                                                                                                                                                                                                                                                                                                                                                                                                                                                                                                                                                                                                                                                                                                                                                                                                                                                                                                                                                                                                                                                                                                                                                                                                                                                                                                                                                                                                                                                                                                                                                                                                                                                                                                                                                                                                                                                                                                                                                                                                                                                                                                                                                                                                   | 6 (5.6)         | 5 (8.9)       | 1 (2.0)       |                        |                        |                                       |     |    |    |    |                         |               |               |               |  |               |  |  |  |  |      |           |          |         |  |        |           |           |           |  |                  |  |  |  |  |       |           |           |           |  |       |         |         |         |  |       |         |         |         |  |       |         |         |         |  |                                     |               |               |               |  |                           |  |  |  |  |         |         |         |         |  |          |           |          |          |  |          |           |           |           |  |          |           |           |           |  |                |           |          |           |  |                             |  |  |  |  |                                      |           |           |           |  |           |         |         |         |  |           |         |         |         |  |                       |         |         |         |  |                       |  |  |  |  |          |             |             |             |  |         |             |             |             |  |                                     |  |  |  |  |          |              |              |              |  |         |              |              |              |  |  |  |
| Resilience, mean (SD)                                                                                                                                                                                                                                                                                                                                                                                                                                                                                                                                                                                                                                                                                                                                                                                                                                                                                                                                                                                                                                                                                                                                                                                                                                                                                                                                                                                                                                                                                                                                                                                                                                                                                                                                                                                                                                                                                                                                                                                                                                                                                                                                                                                                                                                                                                                                                                                                                                                                                                                                                                                                                                                                                                                                                                                                                                                                                                                                                                                                                                                                                                                                                                                                                   |                 |               |               |                        |                        |                                       |     |    |    |    |                         |               |               |               |  |               |  |  |  |  |      |           |          |         |  |        |           |           |           |  |                  |  |  |  |  |       |           |           |           |  |       |         |         |         |  |       |         |         |         |  |       |         |         |         |  |                                     |               |               |               |  |                           |  |  |  |  |         |         |         |         |  |          |           |          |          |  |          |           |           |           |  |          |           |           |           |  |                |           |          |           |  |                             |  |  |  |  |                                      |           |           |           |  |           |         |         |         |  |           |         |         |         |  |                       |         |         |         |  |                       |  |  |  |  |          |             |             |             |  |         |             |             |             |  |                                     |  |  |  |  |          |              |              |              |  |         |              |              |              |  |  |  |
| Baseline                                                                                                                                                                                                                                                                                                                                                                                                                                                                                                                                                                                                                                                                                                                                                                                                                                                                                                                                                                                                                                                                                                                                                                                                                                                                                                                                                                                                                                                                                                                                                                                                                                                                                                                                                                                                                                                                                                                                                                                                                                                                                                                                                                                                                                                                                                                                                                                                                                                                                                                                                                                                                                                                                                                                                                                                                                                                                                                                                                                                                                                                                                                                                                                                                                | 3.02 (0.27)     | 3.01 (0.25)   | 3.04 (0.28)   |                        |                        |                                       |     |    |    |    |                         |               |               |               |  |               |  |  |  |  |      |           |          |         |  |        |           |           |           |  |                  |  |  |  |  |       |           |           |           |  |       |         |         |         |  |       |         |         |         |  |       |         |         |         |  |                                     |               |               |               |  |                           |  |  |  |  |         |         |         |         |  |          |           |          |          |  |          |           |           |           |  |          |           |           |           |  |                |           |          |           |  |                             |  |  |  |  |                                      |           |           |           |  |           |         |         |         |  |           |         |         |         |  |                       |         |         |         |  |                       |  |  |  |  |          |             |             |             |  |         |             |             |             |  |                                     |  |  |  |  |          |              |              |              |  |         |              |              |              |  |  |  |
| 6 weeks                                                                                                                                                                                                                                                                                                                                                                                                                                                                                                                                                                                                                                                                                                                                                                                                                                                                                                                                                                                                                                                                                                                                                                                                                                                                                                                                                                                                                                                                                                                                                                                                                                                                                                                                                                                                                                                                                                                                                                                                                                                                                                                                                                                                                                                                                                                                                                                                                                                                                                                                                                                                                                                                                                                                                                                                                                                                                                                                                                                                                                                                                                                                                                                                                                 | 3.02 (0.26)     | 3.02 (0.25)   | 3.02 (0.26)   |                        |                        |                                       |     |    |    |    |                         |               |               |               |  |               |  |  |  |  |      |           |          |         |  |        |           |           |           |  |                  |  |  |  |  |       |           |           |           |  |       |         |         |         |  |       |         |         |         |  |       |         |         |         |  |                                     |               |               |               |  |                           |  |  |  |  |         |         |         |         |  |          |           |          |          |  |          |           |           |           |  |          |           |           |           |  |                |           |          |           |  |                             |  |  |  |  |                                      |           |           |           |  |           |         |         |         |  |           |         |         |         |  |                       |         |         |         |  |                       |  |  |  |  |          |             |             |             |  |         |             |             |             |  |                                     |  |  |  |  |          |              |              |              |  |         |              |              |              |  |  |  |
| Psychological well-being, mean (SD)                                                                                                                                                                                                                                                                                                                                                                                                                                                                                                                                                                                                                                                                                                                                                                                                                                                                                                                                                                                                                                                                                                                                                                                                                                                                                                                                                                                                                                                                                                                                                                                                                                                                                                                                                                                                                                                                                                                                                                                                                                                                                                                                                                                                                                                                                                                                                                                                                                                                                                                                                                                                                                                                                                                                                                                                                                                                                                                                                                                                                                                                                                                                                                                                     |                 |               |               |                        |                        |                                       |     |    |    |    |                         |               |               |               |  |               |  |  |  |  |      |           |          |         |  |        |           |           |           |  |                  |  |  |  |  |       |           |           |           |  |       |         |         |         |  |       |         |         |         |  |       |         |         |         |  |                                     |               |               |               |  |                           |  |  |  |  |         |         |         |         |  |          |           |          |          |  |          |           |           |           |  |          |           |           |           |  |                |           |          |           |  |                             |  |  |  |  |                                      |           |           |           |  |           |         |         |         |  |           |         |         |         |  |                       |         |         |         |  |                       |  |  |  |  |          |             |             |             |  |         |             |             |             |  |                                     |  |  |  |  |          |              |              |              |  |         |              |              |              |  |  |  |
| Baseline                                                                                                                                                                                                                                                                                                                                                                                                                                                                                                                                                                                                                                                                                                                                                                                                                                                                                                                                                                                                                                                                                                                                                                                                                                                                                                                                                                                                                                                                                                                                                                                                                                                                                                                                                                                                                                                                                                                                                                                                                                                                                                                                                                                                                                                                                                                                                                                                                                                                                                                                                                                                                                                                                                                                                                                                                                                                                                                                                                                                                                                                                                                                                                                                                                | 46.35 (7.52)    | 46.73 (8.32)  | 45.92 (6.59)  |                        |                        |                                       |     |    |    |    |                         |               |               |               |  |               |  |  |  |  |      |           |          |         |  |        |           |           |           |  |                  |  |  |  |  |       |           |           |           |  |       |         |         |         |  |       |         |         |         |  |       |         |         |         |  |                                     |               |               |               |  |                           |  |  |  |  |         |         |         |         |  |          |           |          |          |  |          |           |           |           |  |          |           |           |           |  |                |           |          |           |  |                             |  |  |  |  |                                      |           |           |           |  |           |         |         |         |  |           |         |         |         |  |                       |         |         |         |  |                       |  |  |  |  |          |             |             |             |  |         |             |             |             |  |                                     |  |  |  |  |          |              |              |              |  |         |              |              |              |  |  |  |
| 6 weeks                                                                                                                                                                                                                                                                                                                                                                                                                                                                                                                                                                                                                                                                                                                                                                                                                                                                                                                                                                                                                                                                                                                                                                                                                                                                                                                                                                                                                                                                                                                                                                                                                                                                                                                                                                                                                                                                                                                                                                                                                                                                                                                                                                                                                                                                                                                                                                                                                                                                                                                                                                                                                                                                                                                                                                                                                                                                                                                                                                                                                                                                                                                                                                                                                                 | 47.56 (9.26)    | 48.55 (9.64)  | 46.47 (8.78)  |                        |                        |                                       |     |    |    |    |                         |               |               |               |  |               |  |  |  |  |      |           |          |         |  |        |           |           |           |  |                  |  |  |  |  |       |           |           |           |  |       |         |         |         |  |       |         |         |         |  |       |         |         |         |  |                                     |               |               |               |  |                           |  |  |  |  |         |         |         |         |  |          |           |          |          |  |          |           |           |           |  |          |           |           |           |  |                |           |          |           |  |                             |  |  |  |  |                                      |           |           |           |  |           |         |         |         |  |           |         |         |         |  |                       |         |         |         |  |                       |  |  |  |  |          |             |             |             |  |         |             |             |             |  |                                     |  |  |  |  |          |              |              |              |  |         |              |              |              |  |  |  |
| <p><b>15-i) Report demographics associated with digital divide issues</b></p> <table border="1"> <thead> <tr> <th>Characteristics</th> <th>Total</th> <th>REsOluTioN</th> <th>Na group</th> <th>Waitlist control group</th> </tr> </thead> <tbody> <tr> <td>Number of participants randomized (n)</td> <td>107</td> <td>56</td> <td>51</td> <td>56</td> </tr> <tr> <td>Age in years, mean (SD)</td> <td>43.78 (10.85)</td> <td>44.04 (10.72)</td> <td>43.49 (11.08)</td> <td></td> </tr> <tr> <td>Gender, n (%)</td> <td></td> <td></td> <td></td> <td></td> </tr> <tr> <td>Male</td> <td>12 (11.2)</td> <td>7 (12.5)</td> <td>5 (9.8)</td> <td></td> </tr> <tr> <td>Female</td> <td>95 (88.8)</td> <td>49 (87.5)</td> <td>46 (90.2)</td> <td></td> </tr> <tr> <td>Ethnicity, n (%)</td> <td></td> <td></td> <td></td> <td></td> </tr> <tr> <td>White</td> <td>95 (88.8)</td> <td>52 (92.9)</td> <td>43 (84.3)</td> <td></td> </tr> <tr> <td>Asian</td> <td>3 (2.8)</td> <td>0 (0.0)</td> <td>3 (5.9)</td> <td></td> </tr> <tr> <td>Black</td> <td>7 (6.5)</td> <td>2 (3.6)</td> <td>5 (9.8)</td> <td></td> </tr> <tr> <td>Mixed</td> <td>2 (1.9)</td> <td>2 (3.6)</td> <td>0 (0.0)</td> <td></td> </tr> <tr> <td>Work experience in years, mean (SD)</td> <td>15.75 (11.58)</td> <td>14.88 (11.28)</td> <td>16.71 (11.94)</td> <td></td> </tr> <tr> <td>Level of NHS bands, n (%)</td> <td></td> <td></td> <td></td> <td></td> </tr> <tr> <td>Band 45</td> <td>4 (4.7)</td> <td>4 (7.1)</td> <td>1 (2.0)</td> <td></td> </tr> <tr> <td>Band 516</td> <td>15 (15.0)</td> <td>7 (12.5)</td> <td>9 (17.6)</td> <td></td> </tr> <tr> <td>Band 647</td> <td>43 (43.9)</td> <td>26 (46.4)</td> <td>21 (41.2)</td> <td></td> </tr> <tr> <td>Band 721</td> <td>19 (19.6)</td> <td>11 (19.6)</td> <td>10 (19.6)</td> <td></td> </tr> <tr> <td>Band 8 (a,b,c)</td> <td>18 (16.8)</td> <td>8 (16.8)</td> <td>10 (19.6)</td> <td></td> </tr> <tr> <td>Type of work setting, n (%)</td> <td></td> <td></td> <td></td> <td></td> </tr> <tr> <td>Community and mental health services</td> <td>91 (85.0)</td> <td>46 (82.1)</td> <td>45 (88.2)</td> <td></td> </tr> <tr> <td>Forensics</td> <td>4 (3.7)</td> <td>3 (5.4)</td> <td>1 (2.0)</td> <td></td> </tr> <tr> <td>Corporate</td> <td>6 (5.6)</td> <td>2 (3.6)</td> <td>4 (7.8)</td> <td></td> </tr> <tr> <td>Learning disabilities</td> <td>6 (5.6)</td> <td>5 (8.9)</td> <td>1 (2.0)</td> <td></td> </tr> <tr> <td>Resilience, mean (SD)</td> <td></td> <td></td> <td></td> <td></td> </tr> <tr> <td>Baseline</td> <td>3.02 (0.27)</td> <td>3.01 (0.25)</td> <td>3.04 (0.28)</td> <td></td> </tr> <tr> <td>6 weeks</td> <td>3.02 (0.26)</td> <td>3.02 (0.25)</td> <td>3.02 (0.26)</td> <td></td> </tr> <tr> <td>Psychological well-being, mean (SD)</td> <td></td> <td></td> <td></td> <td></td> </tr> <tr> <td>Baseline</td> <td>46.35 (7.52)</td> <td>46.73 (8.32)</td> <td>45.92 (6.59)</td> <td></td> </tr> <tr> <td>6 weeks</td> <td>47.56 (9.26)</td> <td>48.55 (9.64)</td> <td>46.47 (8.78)</td> <td></td> </tr> </tbody> </table>                                                                                                                                                      | Characteristics | Total         | REsOluTioN    | Na group               | Waitlist control group | Number of participants randomized (n) | 107 | 56 | 51 | 56 | Age in years, mean (SD) | 43.78 (10.85) | 44.04 (10.72) | 43.49 (11.08) |  | Gender, n (%) |  |  |  |  | Male | 12 (11.2) | 7 (12.5) | 5 (9.8) |  | Female | 95 (88.8) | 49 (87.5) | 46 (90.2) |  | Ethnicity, n (%) |  |  |  |  | White | 95 (88.8) | 52 (92.9) | 43 (84.3) |  | Asian | 3 (2.8) | 0 (0.0) | 3 (5.9) |  | Black | 7 (6.5) | 2 (3.6) | 5 (9.8) |  | Mixed | 2 (1.9) | 2 (3.6) | 0 (0.0) |  | Work experience in years, mean (SD) | 15.75 (11.58) | 14.88 (11.28) | 16.71 (11.94) |  | Level of NHS bands, n (%) |  |  |  |  | Band 45 | 4 (4.7) | 4 (7.1) | 1 (2.0) |  | Band 516 | 15 (15.0) | 7 (12.5) | 9 (17.6) |  | Band 647 | 43 (43.9) | 26 (46.4) | 21 (41.2) |  | Band 721 | 19 (19.6) | 11 (19.6) | 10 (19.6) |  | Band 8 (a,b,c) | 18 (16.8) | 8 (16.8) | 10 (19.6) |  | Type of work setting, n (%) |  |  |  |  | Community and mental health services | 91 (85.0) | 46 (82.1) | 45 (88.2) |  | Forensics | 4 (3.7) | 3 (5.4) | 1 (2.0) |  | Corporate | 6 (5.6) | 2 (3.6) | 4 (7.8) |  | Learning disabilities | 6 (5.6) | 5 (8.9) | 1 (2.0) |  | Resilience, mean (SD) |  |  |  |  | Baseline | 3.02 (0.27) | 3.01 (0.25) | 3.04 (0.28) |  | 6 weeks | 3.02 (0.26) | 3.02 (0.25) | 3.02 (0.26) |  | Psychological well-being, mean (SD) |  |  |  |  | Baseline | 46.35 (7.52) | 46.73 (8.32) | 45.92 (6.59) |  | 6 weeks | 47.56 (9.26) | 48.55 (9.64) | 46.47 (8.78) |  |  |  |
| Characteristics                                                                                                                                                                                                                                                                                                                                                                                                                                                                                                                                                                                                                                                                                                                                                                                                                                                                                                                                                                                                                                                                                                                                                                                                                                                                                                                                                                                                                                                                                                                                                                                                                                                                                                                                                                                                                                                                                                                                                                                                                                                                                                                                                                                                                                                                                                                                                                                                                                                                                                                                                                                                                                                                                                                                                                                                                                                                                                                                                                                                                                                                                                                                                                                                                         | Total           | REsOluTioN    | Na group      | Waitlist control group |                        |                                       |     |    |    |    |                         |               |               |               |  |               |  |  |  |  |      |           |          |         |  |        |           |           |           |  |                  |  |  |  |  |       |           |           |           |  |       |         |         |         |  |       |         |         |         |  |       |         |         |         |  |                                     |               |               |               |  |                           |  |  |  |  |         |         |         |         |  |          |           |          |          |  |          |           |           |           |  |          |           |           |           |  |                |           |          |           |  |                             |  |  |  |  |                                      |           |           |           |  |           |         |         |         |  |           |         |         |         |  |                       |         |         |         |  |                       |  |  |  |  |          |             |             |             |  |         |             |             |             |  |                                     |  |  |  |  |          |              |              |              |  |         |              |              |              |  |  |  |
| Number of participants randomized (n)                                                                                                                                                                                                                                                                                                                                                                                                                                                                                                                                                                                                                                                                                                                                                                                                                                                                                                                                                                                                                                                                                                                                                                                                                                                                                                                                                                                                                                                                                                                                                                                                                                                                                                                                                                                                                                                                                                                                                                                                                                                                                                                                                                                                                                                                                                                                                                                                                                                                                                                                                                                                                                                                                                                                                                                                                                                                                                                                                                                                                                                                                                                                                                                                   | 107             | 56            | 51            | 56                     |                        |                                       |     |    |    |    |                         |               |               |               |  |               |  |  |  |  |      |           |          |         |  |        |           |           |           |  |                  |  |  |  |  |       |           |           |           |  |       |         |         |         |  |       |         |         |         |  |       |         |         |         |  |                                     |               |               |               |  |                           |  |  |  |  |         |         |         |         |  |          |           |          |          |  |          |           |           |           |  |          |           |           |           |  |                |           |          |           |  |                             |  |  |  |  |                                      |           |           |           |  |           |         |         |         |  |           |         |         |         |  |                       |         |         |         |  |                       |  |  |  |  |          |             |             |             |  |         |             |             |             |  |                                     |  |  |  |  |          |              |              |              |  |         |              |              |              |  |  |  |
| Age in years, mean (SD)                                                                                                                                                                                                                                                                                                                                                                                                                                                                                                                                                                                                                                                                                                                                                                                                                                                                                                                                                                                                                                                                                                                                                                                                                                                                                                                                                                                                                                                                                                                                                                                                                                                                                                                                                                                                                                                                                                                                                                                                                                                                                                                                                                                                                                                                                                                                                                                                                                                                                                                                                                                                                                                                                                                                                                                                                                                                                                                                                                                                                                                                                                                                                                                                                 | 43.78 (10.85)   | 44.04 (10.72) | 43.49 (11.08) |                        |                        |                                       |     |    |    |    |                         |               |               |               |  |               |  |  |  |  |      |           |          |         |  |        |           |           |           |  |                  |  |  |  |  |       |           |           |           |  |       |         |         |         |  |       |         |         |         |  |       |         |         |         |  |                                     |               |               |               |  |                           |  |  |  |  |         |         |         |         |  |          |           |          |          |  |          |           |           |           |  |          |           |           |           |  |                |           |          |           |  |                             |  |  |  |  |                                      |           |           |           |  |           |         |         |         |  |           |         |         |         |  |                       |         |         |         |  |                       |  |  |  |  |          |             |             |             |  |         |             |             |             |  |                                     |  |  |  |  |          |              |              |              |  |         |              |              |              |  |  |  |
| Gender, n (%)                                                                                                                                                                                                                                                                                                                                                                                                                                                                                                                                                                                                                                                                                                                                                                                                                                                                                                                                                                                                                                                                                                                                                                                                                                                                                                                                                                                                                                                                                                                                                                                                                                                                                                                                                                                                                                                                                                                                                                                                                                                                                                                                                                                                                                                                                                                                                                                                                                                                                                                                                                                                                                                                                                                                                                                                                                                                                                                                                                                                                                                                                                                                                                                                                           |                 |               |               |                        |                        |                                       |     |    |    |    |                         |               |               |               |  |               |  |  |  |  |      |           |          |         |  |        |           |           |           |  |                  |  |  |  |  |       |           |           |           |  |       |         |         |         |  |       |         |         |         |  |       |         |         |         |  |                                     |               |               |               |  |                           |  |  |  |  |         |         |         |         |  |          |           |          |          |  |          |           |           |           |  |          |           |           |           |  |                |           |          |           |  |                             |  |  |  |  |                                      |           |           |           |  |           |         |         |         |  |           |         |         |         |  |                       |         |         |         |  |                       |  |  |  |  |          |             |             |             |  |         |             |             |             |  |                                     |  |  |  |  |          |              |              |              |  |         |              |              |              |  |  |  |
| Male                                                                                                                                                                                                                                                                                                                                                                                                                                                                                                                                                                                                                                                                                                                                                                                                                                                                                                                                                                                                                                                                                                                                                                                                                                                                                                                                                                                                                                                                                                                                                                                                                                                                                                                                                                                                                                                                                                                                                                                                                                                                                                                                                                                                                                                                                                                                                                                                                                                                                                                                                                                                                                                                                                                                                                                                                                                                                                                                                                                                                                                                                                                                                                                                                                    | 12 (11.2)       | 7 (12.5)      | 5 (9.8)       |                        |                        |                                       |     |    |    |    |                         |               |               |               |  |               |  |  |  |  |      |           |          |         |  |        |           |           |           |  |                  |  |  |  |  |       |           |           |           |  |       |         |         |         |  |       |         |         |         |  |       |         |         |         |  |                                     |               |               |               |  |                           |  |  |  |  |         |         |         |         |  |          |           |          |          |  |          |           |           |           |  |          |           |           |           |  |                |           |          |           |  |                             |  |  |  |  |                                      |           |           |           |  |           |         |         |         |  |           |         |         |         |  |                       |         |         |         |  |                       |  |  |  |  |          |             |             |             |  |         |             |             |             |  |                                     |  |  |  |  |          |              |              |              |  |         |              |              |              |  |  |  |
| Female                                                                                                                                                                                                                                                                                                                                                                                                                                                                                                                                                                                                                                                                                                                                                                                                                                                                                                                                                                                                                                                                                                                                                                                                                                                                                                                                                                                                                                                                                                                                                                                                                                                                                                                                                                                                                                                                                                                                                                                                                                                                                                                                                                                                                                                                                                                                                                                                                                                                                                                                                                                                                                                                                                                                                                                                                                                                                                                                                                                                                                                                                                                                                                                                                                  | 95 (88.8)       | 49 (87.5)     | 46 (90.2)     |                        |                        |                                       |     |    |    |    |                         |               |               |               |  |               |  |  |  |  |      |           |          |         |  |        |           |           |           |  |                  |  |  |  |  |       |           |           |           |  |       |         |         |         |  |       |         |         |         |  |       |         |         |         |  |                                     |               |               |               |  |                           |  |  |  |  |         |         |         |         |  |          |           |          |          |  |          |           |           |           |  |          |           |           |           |  |                |           |          |           |  |                             |  |  |  |  |                                      |           |           |           |  |           |         |         |         |  |           |         |         |         |  |                       |         |         |         |  |                       |  |  |  |  |          |             |             |             |  |         |             |             |             |  |                                     |  |  |  |  |          |              |              |              |  |         |              |              |              |  |  |  |
| Ethnicity, n (%)                                                                                                                                                                                                                                                                                                                                                                                                                                                                                                                                                                                                                                                                                                                                                                                                                                                                                                                                                                                                                                                                                                                                                                                                                                                                                                                                                                                                                                                                                                                                                                                                                                                                                                                                                                                                                                                                                                                                                                                                                                                                                                                                                                                                                                                                                                                                                                                                                                                                                                                                                                                                                                                                                                                                                                                                                                                                                                                                                                                                                                                                                                                                                                                                                        |                 |               |               |                        |                        |                                       |     |    |    |    |                         |               |               |               |  |               |  |  |  |  |      |           |          |         |  |        |           |           |           |  |                  |  |  |  |  |       |           |           |           |  |       |         |         |         |  |       |         |         |         |  |       |         |         |         |  |                                     |               |               |               |  |                           |  |  |  |  |         |         |         |         |  |          |           |          |          |  |          |           |           |           |  |          |           |           |           |  |                |           |          |           |  |                             |  |  |  |  |                                      |           |           |           |  |           |         |         |         |  |           |         |         |         |  |                       |         |         |         |  |                       |  |  |  |  |          |             |             |             |  |         |             |             |             |  |                                     |  |  |  |  |          |              |              |              |  |         |              |              |              |  |  |  |
| White                                                                                                                                                                                                                                                                                                                                                                                                                                                                                                                                                                                                                                                                                                                                                                                                                                                                                                                                                                                                                                                                                                                                                                                                                                                                                                                                                                                                                                                                                                                                                                                                                                                                                                                                                                                                                                                                                                                                                                                                                                                                                                                                                                                                                                                                                                                                                                                                                                                                                                                                                                                                                                                                                                                                                                                                                                                                                                                                                                                                                                                                                                                                                                                                                                   | 95 (88.8)       | 52 (92.9)     | 43 (84.3)     |                        |                        |                                       |     |    |    |    |                         |               |               |               |  |               |  |  |  |  |      |           |          |         |  |        |           |           |           |  |                  |  |  |  |  |       |           |           |           |  |       |         |         |         |  |       |         |         |         |  |       |         |         |         |  |                                     |               |               |               |  |                           |  |  |  |  |         |         |         |         |  |          |           |          |          |  |          |           |           |           |  |          |           |           |           |  |                |           |          |           |  |                             |  |  |  |  |                                      |           |           |           |  |           |         |         |         |  |           |         |         |         |  |                       |         |         |         |  |                       |  |  |  |  |          |             |             |             |  |         |             |             |             |  |                                     |  |  |  |  |          |              |              |              |  |         |              |              |              |  |  |  |
| Asian                                                                                                                                                                                                                                                                                                                                                                                                                                                                                                                                                                                                                                                                                                                                                                                                                                                                                                                                                                                                                                                                                                                                                                                                                                                                                                                                                                                                                                                                                                                                                                                                                                                                                                                                                                                                                                                                                                                                                                                                                                                                                                                                                                                                                                                                                                                                                                                                                                                                                                                                                                                                                                                                                                                                                                                                                                                                                                                                                                                                                                                                                                                                                                                                                                   | 3 (2.8)         | 0 (0.0)       | 3 (5.9)       |                        |                        |                                       |     |    |    |    |                         |               |               |               |  |               |  |  |  |  |      |           |          |         |  |        |           |           |           |  |                  |  |  |  |  |       |           |           |           |  |       |         |         |         |  |       |         |         |         |  |       |         |         |         |  |                                     |               |               |               |  |                           |  |  |  |  |         |         |         |         |  |          |           |          |          |  |          |           |           |           |  |          |           |           |           |  |                |           |          |           |  |                             |  |  |  |  |                                      |           |           |           |  |           |         |         |         |  |           |         |         |         |  |                       |         |         |         |  |                       |  |  |  |  |          |             |             |             |  |         |             |             |             |  |                                     |  |  |  |  |          |              |              |              |  |         |              |              |              |  |  |  |
| Black                                                                                                                                                                                                                                                                                                                                                                                                                                                                                                                                                                                                                                                                                                                                                                                                                                                                                                                                                                                                                                                                                                                                                                                                                                                                                                                                                                                                                                                                                                                                                                                                                                                                                                                                                                                                                                                                                                                                                                                                                                                                                                                                                                                                                                                                                                                                                                                                                                                                                                                                                                                                                                                                                                                                                                                                                                                                                                                                                                                                                                                                                                                                                                                                                                   | 7 (6.5)         | 2 (3.6)       | 5 (9.8)       |                        |                        |                                       |     |    |    |    |                         |               |               |               |  |               |  |  |  |  |      |           |          |         |  |        |           |           |           |  |                  |  |  |  |  |       |           |           |           |  |       |         |         |         |  |       |         |         |         |  |       |         |         |         |  |                                     |               |               |               |  |                           |  |  |  |  |         |         |         |         |  |          |           |          |          |  |          |           |           |           |  |          |           |           |           |  |                |           |          |           |  |                             |  |  |  |  |                                      |           |           |           |  |           |         |         |         |  |           |         |         |         |  |                       |         |         |         |  |                       |  |  |  |  |          |             |             |             |  |         |             |             |             |  |                                     |  |  |  |  |          |              |              |              |  |         |              |              |              |  |  |  |
| Mixed                                                                                                                                                                                                                                                                                                                                                                                                                                                                                                                                                                                                                                                                                                                                                                                                                                                                                                                                                                                                                                                                                                                                                                                                                                                                                                                                                                                                                                                                                                                                                                                                                                                                                                                                                                                                                                                                                                                                                                                                                                                                                                                                                                                                                                                                                                                                                                                                                                                                                                                                                                                                                                                                                                                                                                                                                                                                                                                                                                                                                                                                                                                                                                                                                                   | 2 (1.9)         | 2 (3.6)       | 0 (0.0)       |                        |                        |                                       |     |    |    |    |                         |               |               |               |  |               |  |  |  |  |      |           |          |         |  |        |           |           |           |  |                  |  |  |  |  |       |           |           |           |  |       |         |         |         |  |       |         |         |         |  |       |         |         |         |  |                                     |               |               |               |  |                           |  |  |  |  |         |         |         |         |  |          |           |          |          |  |          |           |           |           |  |          |           |           |           |  |                |           |          |           |  |                             |  |  |  |  |                                      |           |           |           |  |           |         |         |         |  |           |         |         |         |  |                       |         |         |         |  |                       |  |  |  |  |          |             |             |             |  |         |             |             |             |  |                                     |  |  |  |  |          |              |              |              |  |         |              |              |              |  |  |  |
| Work experience in years, mean (SD)                                                                                                                                                                                                                                                                                                                                                                                                                                                                                                                                                                                                                                                                                                                                                                                                                                                                                                                                                                                                                                                                                                                                                                                                                                                                                                                                                                                                                                                                                                                                                                                                                                                                                                                                                                                                                                                                                                                                                                                                                                                                                                                                                                                                                                                                                                                                                                                                                                                                                                                                                                                                                                                                                                                                                                                                                                                                                                                                                                                                                                                                                                                                                                                                     | 15.75 (11.58)   | 14.88 (11.28) | 16.71 (11.94) |                        |                        |                                       |     |    |    |    |                         |               |               |               |  |               |  |  |  |  |      |           |          |         |  |        |           |           |           |  |                  |  |  |  |  |       |           |           |           |  |       |         |         |         |  |       |         |         |         |  |       |         |         |         |  |                                     |               |               |               |  |                           |  |  |  |  |         |         |         |         |  |          |           |          |          |  |          |           |           |           |  |          |           |           |           |  |                |           |          |           |  |                             |  |  |  |  |                                      |           |           |           |  |           |         |         |         |  |           |         |         |         |  |                       |         |         |         |  |                       |  |  |  |  |          |             |             |             |  |         |             |             |             |  |                                     |  |  |  |  |          |              |              |              |  |         |              |              |              |  |  |  |
| Level of NHS bands, n (%)                                                                                                                                                                                                                                                                                                                                                                                                                                                                                                                                                                                                                                                                                                                                                                                                                                                                                                                                                                                                                                                                                                                                                                                                                                                                                                                                                                                                                                                                                                                                                                                                                                                                                                                                                                                                                                                                                                                                                                                                                                                                                                                                                                                                                                                                                                                                                                                                                                                                                                                                                                                                                                                                                                                                                                                                                                                                                                                                                                                                                                                                                                                                                                                                               |                 |               |               |                        |                        |                                       |     |    |    |    |                         |               |               |               |  |               |  |  |  |  |      |           |          |         |  |        |           |           |           |  |                  |  |  |  |  |       |           |           |           |  |       |         |         |         |  |       |         |         |         |  |       |         |         |         |  |                                     |               |               |               |  |                           |  |  |  |  |         |         |         |         |  |          |           |          |          |  |          |           |           |           |  |          |           |           |           |  |                |           |          |           |  |                             |  |  |  |  |                                      |           |           |           |  |           |         |         |         |  |           |         |         |         |  |                       |         |         |         |  |                       |  |  |  |  |          |             |             |             |  |         |             |             |             |  |                                     |  |  |  |  |          |              |              |              |  |         |              |              |              |  |  |  |
| Band 45                                                                                                                                                                                                                                                                                                                                                                                                                                                                                                                                                                                                                                                                                                                                                                                                                                                                                                                                                                                                                                                                                                                                                                                                                                                                                                                                                                                                                                                                                                                                                                                                                                                                                                                                                                                                                                                                                                                                                                                                                                                                                                                                                                                                                                                                                                                                                                                                                                                                                                                                                                                                                                                                                                                                                                                                                                                                                                                                                                                                                                                                                                                                                                                                                                 | 4 (4.7)         | 4 (7.1)       | 1 (2.0)       |                        |                        |                                       |     |    |    |    |                         |               |               |               |  |               |  |  |  |  |      |           |          |         |  |        |           |           |           |  |                  |  |  |  |  |       |           |           |           |  |       |         |         |         |  |       |         |         |         |  |       |         |         |         |  |                                     |               |               |               |  |                           |  |  |  |  |         |         |         |         |  |          |           |          |          |  |          |           |           |           |  |          |           |           |           |  |                |           |          |           |  |                             |  |  |  |  |                                      |           |           |           |  |           |         |         |         |  |           |         |         |         |  |                       |         |         |         |  |                       |  |  |  |  |          |             |             |             |  |         |             |             |             |  |                                     |  |  |  |  |          |              |              |              |  |         |              |              |              |  |  |  |
| Band 516                                                                                                                                                                                                                                                                                                                                                                                                                                                                                                                                                                                                                                                                                                                                                                                                                                                                                                                                                                                                                                                                                                                                                                                                                                                                                                                                                                                                                                                                                                                                                                                                                                                                                                                                                                                                                                                                                                                                                                                                                                                                                                                                                                                                                                                                                                                                                                                                                                                                                                                                                                                                                                                                                                                                                                                                                                                                                                                                                                                                                                                                                                                                                                                                                                | 15 (15.0)       | 7 (12.5)      | 9 (17.6)      |                        |                        |                                       |     |    |    |    |                         |               |               |               |  |               |  |  |  |  |      |           |          |         |  |        |           |           |           |  |                  |  |  |  |  |       |           |           |           |  |       |         |         |         |  |       |         |         |         |  |       |         |         |         |  |                                     |               |               |               |  |                           |  |  |  |  |         |         |         |         |  |          |           |          |          |  |          |           |           |           |  |          |           |           |           |  |                |           |          |           |  |                             |  |  |  |  |                                      |           |           |           |  |           |         |         |         |  |           |         |         |         |  |                       |         |         |         |  |                       |  |  |  |  |          |             |             |             |  |         |             |             |             |  |                                     |  |  |  |  |          |              |              |              |  |         |              |              |              |  |  |  |
| Band 647                                                                                                                                                                                                                                                                                                                                                                                                                                                                                                                                                                                                                                                                                                                                                                                                                                                                                                                                                                                                                                                                                                                                                                                                                                                                                                                                                                                                                                                                                                                                                                                                                                                                                                                                                                                                                                                                                                                                                                                                                                                                                                                                                                                                                                                                                                                                                                                                                                                                                                                                                                                                                                                                                                                                                                                                                                                                                                                                                                                                                                                                                                                                                                                                                                | 43 (43.9)       | 26 (46.4)     | 21 (41.2)     |                        |                        |                                       |     |    |    |    |                         |               |               |               |  |               |  |  |  |  |      |           |          |         |  |        |           |           |           |  |                  |  |  |  |  |       |           |           |           |  |       |         |         |         |  |       |         |         |         |  |       |         |         |         |  |                                     |               |               |               |  |                           |  |  |  |  |         |         |         |         |  |          |           |          |          |  |          |           |           |           |  |          |           |           |           |  |                |           |          |           |  |                             |  |  |  |  |                                      |           |           |           |  |           |         |         |         |  |           |         |         |         |  |                       |         |         |         |  |                       |  |  |  |  |          |             |             |             |  |         |             |             |             |  |                                     |  |  |  |  |          |              |              |              |  |         |              |              |              |  |  |  |
| Band 721                                                                                                                                                                                                                                                                                                                                                                                                                                                                                                                                                                                                                                                                                                                                                                                                                                                                                                                                                                                                                                                                                                                                                                                                                                                                                                                                                                                                                                                                                                                                                                                                                                                                                                                                                                                                                                                                                                                                                                                                                                                                                                                                                                                                                                                                                                                                                                                                                                                                                                                                                                                                                                                                                                                                                                                                                                                                                                                                                                                                                                                                                                                                                                                                                                | 19 (19.6)       | 11 (19.6)     | 10 (19.6)     |                        |                        |                                       |     |    |    |    |                         |               |               |               |  |               |  |  |  |  |      |           |          |         |  |        |           |           |           |  |                  |  |  |  |  |       |           |           |           |  |       |         |         |         |  |       |         |         |         |  |       |         |         |         |  |                                     |               |               |               |  |                           |  |  |  |  |         |         |         |         |  |          |           |          |          |  |          |           |           |           |  |          |           |           |           |  |                |           |          |           |  |                             |  |  |  |  |                                      |           |           |           |  |           |         |         |         |  |           |         |         |         |  |                       |         |         |         |  |                       |  |  |  |  |          |             |             |             |  |         |             |             |             |  |                                     |  |  |  |  |          |              |              |              |  |         |              |              |              |  |  |  |
| Band 8 (a,b,c)                                                                                                                                                                                                                                                                                                                                                                                                                                                                                                                                                                                                                                                                                                                                                                                                                                                                                                                                                                                                                                                                                                                                                                                                                                                                                                                                                                                                                                                                                                                                                                                                                                                                                                                                                                                                                                                                                                                                                                                                                                                                                                                                                                                                                                                                                                                                                                                                                                                                                                                                                                                                                                                                                                                                                                                                                                                                                                                                                                                                                                                                                                                                                                                                                          | 18 (16.8)       | 8 (16.8)      | 10 (19.6)     |                        |                        |                                       |     |    |    |    |                         |               |               |               |  |               |  |  |  |  |      |           |          |         |  |        |           |           |           |  |                  |  |  |  |  |       |           |           |           |  |       |         |         |         |  |       |         |         |         |  |       |         |         |         |  |                                     |               |               |               |  |                           |  |  |  |  |         |         |         |         |  |          |           |          |          |  |          |           |           |           |  |          |           |           |           |  |                |           |          |           |  |                             |  |  |  |  |                                      |           |           |           |  |           |         |         |         |  |           |         |         |         |  |                       |         |         |         |  |                       |  |  |  |  |          |             |             |             |  |         |             |             |             |  |                                     |  |  |  |  |          |              |              |              |  |         |              |              |              |  |  |  |
| Type of work setting, n (%)                                                                                                                                                                                                                                                                                                                                                                                                                                                                                                                                                                                                                                                                                                                                                                                                                                                                                                                                                                                                                                                                                                                                                                                                                                                                                                                                                                                                                                                                                                                                                                                                                                                                                                                                                                                                                                                                                                                                                                                                                                                                                                                                                                                                                                                                                                                                                                                                                                                                                                                                                                                                                                                                                                                                                                                                                                                                                                                                                                                                                                                                                                                                                                                                             |                 |               |               |                        |                        |                                       |     |    |    |    |                         |               |               |               |  |               |  |  |  |  |      |           |          |         |  |        |           |           |           |  |                  |  |  |  |  |       |           |           |           |  |       |         |         |         |  |       |         |         |         |  |       |         |         |         |  |                                     |               |               |               |  |                           |  |  |  |  |         |         |         |         |  |          |           |          |          |  |          |           |           |           |  |          |           |           |           |  |                |           |          |           |  |                             |  |  |  |  |                                      |           |           |           |  |           |         |         |         |  |           |         |         |         |  |                       |         |         |         |  |                       |  |  |  |  |          |             |             |             |  |         |             |             |             |  |                                     |  |  |  |  |          |              |              |              |  |         |              |              |              |  |  |  |
| Community and mental health services                                                                                                                                                                                                                                                                                                                                                                                                                                                                                                                                                                                                                                                                                                                                                                                                                                                                                                                                                                                                                                                                                                                                                                                                                                                                                                                                                                                                                                                                                                                                                                                                                                                                                                                                                                                                                                                                                                                                                                                                                                                                                                                                                                                                                                                                                                                                                                                                                                                                                                                                                                                                                                                                                                                                                                                                                                                                                                                                                                                                                                                                                                                                                                                                    | 91 (85.0)       | 46 (82.1)     | 45 (88.2)     |                        |                        |                                       |     |    |    |    |                         |               |               |               |  |               |  |  |  |  |      |           |          |         |  |        |           |           |           |  |                  |  |  |  |  |       |           |           |           |  |       |         |         |         |  |       |         |         |         |  |       |         |         |         |  |                                     |               |               |               |  |                           |  |  |  |  |         |         |         |         |  |          |           |          |          |  |          |           |           |           |  |          |           |           |           |  |                |           |          |           |  |                             |  |  |  |  |                                      |           |           |           |  |           |         |         |         |  |           |         |         |         |  |                       |         |         |         |  |                       |  |  |  |  |          |             |             |             |  |         |             |             |             |  |                                     |  |  |  |  |          |              |              |              |  |         |              |              |              |  |  |  |
| Forensics                                                                                                                                                                                                                                                                                                                                                                                                                                                                                                                                                                                                                                                                                                                                                                                                                                                                                                                                                                                                                                                                                                                                                                                                                                                                                                                                                                                                                                                                                                                                                                                                                                                                                                                                                                                                                                                                                                                                                                                                                                                                                                                                                                                                                                                                                                                                                                                                                                                                                                                                                                                                                                                                                                                                                                                                                                                                                                                                                                                                                                                                                                                                                                                                                               | 4 (3.7)         | 3 (5.4)       | 1 (2.0)       |                        |                        |                                       |     |    |    |    |                         |               |               |               |  |               |  |  |  |  |      |           |          |         |  |        |           |           |           |  |                  |  |  |  |  |       |           |           |           |  |       |         |         |         |  |       |         |         |         |  |       |         |         |         |  |                                     |               |               |               |  |                           |  |  |  |  |         |         |         |         |  |          |           |          |          |  |          |           |           |           |  |          |           |           |           |  |                |           |          |           |  |                             |  |  |  |  |                                      |           |           |           |  |           |         |         |         |  |           |         |         |         |  |                       |         |         |         |  |                       |  |  |  |  |          |             |             |             |  |         |             |             |             |  |                                     |  |  |  |  |          |              |              |              |  |         |              |              |              |  |  |  |
| Corporate                                                                                                                                                                                                                                                                                                                                                                                                                                                                                                                                                                                                                                                                                                                                                                                                                                                                                                                                                                                                                                                                                                                                                                                                                                                                                                                                                                                                                                                                                                                                                                                                                                                                                                                                                                                                                                                                                                                                                                                                                                                                                                                                                                                                                                                                                                                                                                                                                                                                                                                                                                                                                                                                                                                                                                                                                                                                                                                                                                                                                                                                                                                                                                                                                               | 6 (5.6)         | 2 (3.6)       | 4 (7.8)       |                        |                        |                                       |     |    |    |    |                         |               |               |               |  |               |  |  |  |  |      |           |          |         |  |        |           |           |           |  |                  |  |  |  |  |       |           |           |           |  |       |         |         |         |  |       |         |         |         |  |       |         |         |         |  |                                     |               |               |               |  |                           |  |  |  |  |         |         |         |         |  |          |           |          |          |  |          |           |           |           |  |          |           |           |           |  |                |           |          |           |  |                             |  |  |  |  |                                      |           |           |           |  |           |         |         |         |  |           |         |         |         |  |                       |         |         |         |  |                       |  |  |  |  |          |             |             |             |  |         |             |             |             |  |                                     |  |  |  |  |          |              |              |              |  |         |              |              |              |  |  |  |
| Learning disabilities                                                                                                                                                                                                                                                                                                                                                                                                                                                                                                                                                                                                                                                                                                                                                                                                                                                                                                                                                                                                                                                                                                                                                                                                                                                                                                                                                                                                                                                                                                                                                                                                                                                                                                                                                                                                                                                                                                                                                                                                                                                                                                                                                                                                                                                                                                                                                                                                                                                                                                                                                                                                                                                                                                                                                                                                                                                                                                                                                                                                                                                                                                                                                                                                                   | 6 (5.6)         | 5 (8.9)       | 1 (2.0)       |                        |                        |                                       |     |    |    |    |                         |               |               |               |  |               |  |  |  |  |      |           |          |         |  |        |           |           |           |  |                  |  |  |  |  |       |           |           |           |  |       |         |         |         |  |       |         |         |         |  |       |         |         |         |  |                                     |               |               |               |  |                           |  |  |  |  |         |         |         |         |  |          |           |          |          |  |          |           |           |           |  |          |           |           |           |  |                |           |          |           |  |                             |  |  |  |  |                                      |           |           |           |  |           |         |         |         |  |           |         |         |         |  |                       |         |         |         |  |                       |  |  |  |  |          |             |             |             |  |         |             |             |             |  |                                     |  |  |  |  |          |              |              |              |  |         |              |              |              |  |  |  |
| Resilience, mean (SD)                                                                                                                                                                                                                                                                                                                                                                                                                                                                                                                                                                                                                                                                                                                                                                                                                                                                                                                                                                                                                                                                                                                                                                                                                                                                                                                                                                                                                                                                                                                                                                                                                                                                                                                                                                                                                                                                                                                                                                                                                                                                                                                                                                                                                                                                                                                                                                                                                                                                                                                                                                                                                                                                                                                                                                                                                                                                                                                                                                                                                                                                                                                                                                                                                   |                 |               |               |                        |                        |                                       |     |    |    |    |                         |               |               |               |  |               |  |  |  |  |      |           |          |         |  |        |           |           |           |  |                  |  |  |  |  |       |           |           |           |  |       |         |         |         |  |       |         |         |         |  |       |         |         |         |  |                                     |               |               |               |  |                           |  |  |  |  |         |         |         |         |  |          |           |          |          |  |          |           |           |           |  |          |           |           |           |  |                |           |          |           |  |                             |  |  |  |  |                                      |           |           |           |  |           |         |         |         |  |           |         |         |         |  |                       |         |         |         |  |                       |  |  |  |  |          |             |             |             |  |         |             |             |             |  |                                     |  |  |  |  |          |              |              |              |  |         |              |              |              |  |  |  |
| Baseline                                                                                                                                                                                                                                                                                                                                                                                                                                                                                                                                                                                                                                                                                                                                                                                                                                                                                                                                                                                                                                                                                                                                                                                                                                                                                                                                                                                                                                                                                                                                                                                                                                                                                                                                                                                                                                                                                                                                                                                                                                                                                                                                                                                                                                                                                                                                                                                                                                                                                                                                                                                                                                                                                                                                                                                                                                                                                                                                                                                                                                                                                                                                                                                                                                | 3.02 (0.27)     | 3.01 (0.25)   | 3.04 (0.28)   |                        |                        |                                       |     |    |    |    |                         |               |               |               |  |               |  |  |  |  |      |           |          |         |  |        |           |           |           |  |                  |  |  |  |  |       |           |           |           |  |       |         |         |         |  |       |         |         |         |  |       |         |         |         |  |                                     |               |               |               |  |                           |  |  |  |  |         |         |         |         |  |          |           |          |          |  |          |           |           |           |  |          |           |           |           |  |                |           |          |           |  |                             |  |  |  |  |                                      |           |           |           |  |           |         |         |         |  |           |         |         |         |  |                       |         |         |         |  |                       |  |  |  |  |          |             |             |             |  |         |             |             |             |  |                                     |  |  |  |  |          |              |              |              |  |         |              |              |              |  |  |  |
| 6 weeks                                                                                                                                                                                                                                                                                                                                                                                                                                                                                                                                                                                                                                                                                                                                                                                                                                                                                                                                                                                                                                                                                                                                                                                                                                                                                                                                                                                                                                                                                                                                                                                                                                                                                                                                                                                                                                                                                                                                                                                                                                                                                                                                                                                                                                                                                                                                                                                                                                                                                                                                                                                                                                                                                                                                                                                                                                                                                                                                                                                                                                                                                                                                                                                                                                 | 3.02 (0.26)     | 3.02 (0.25)   | 3.02 (0.26)   |                        |                        |                                       |     |    |    |    |                         |               |               |               |  |               |  |  |  |  |      |           |          |         |  |        |           |           |           |  |                  |  |  |  |  |       |           |           |           |  |       |         |         |         |  |       |         |         |         |  |       |         |         |         |  |                                     |               |               |               |  |                           |  |  |  |  |         |         |         |         |  |          |           |          |          |  |          |           |           |           |  |          |           |           |           |  |                |           |          |           |  |                             |  |  |  |  |                                      |           |           |           |  |           |         |         |         |  |           |         |         |         |  |                       |         |         |         |  |                       |  |  |  |  |          |             |             |             |  |         |             |             |             |  |                                     |  |  |  |  |          |              |              |              |  |         |              |              |              |  |  |  |
| Psychological well-being, mean (SD)                                                                                                                                                                                                                                                                                                                                                                                                                                                                                                                                                                                                                                                                                                                                                                                                                                                                                                                                                                                                                                                                                                                                                                                                                                                                                                                                                                                                                                                                                                                                                                                                                                                                                                                                                                                                                                                                                                                                                                                                                                                                                                                                                                                                                                                                                                                                                                                                                                                                                                                                                                                                                                                                                                                                                                                                                                                                                                                                                                                                                                                                                                                                                                                                     |                 |               |               |                        |                        |                                       |     |    |    |    |                         |               |               |               |  |               |  |  |  |  |      |           |          |         |  |        |           |           |           |  |                  |  |  |  |  |       |           |           |           |  |       |         |         |         |  |       |         |         |         |  |       |         |         |         |  |                                     |               |               |               |  |                           |  |  |  |  |         |         |         |         |  |          |           |          |          |  |          |           |           |           |  |          |           |           |           |  |                |           |          |           |  |                             |  |  |  |  |                                      |           |           |           |  |           |         |         |         |  |           |         |         |         |  |                       |         |         |         |  |                       |  |  |  |  |          |             |             |             |  |         |             |             |             |  |                                     |  |  |  |  |          |              |              |              |  |         |              |              |              |  |  |  |
| Baseline                                                                                                                                                                                                                                                                                                                                                                                                                                                                                                                                                                                                                                                                                                                                                                                                                                                                                                                                                                                                                                                                                                                                                                                                                                                                                                                                                                                                                                                                                                                                                                                                                                                                                                                                                                                                                                                                                                                                                                                                                                                                                                                                                                                                                                                                                                                                                                                                                                                                                                                                                                                                                                                                                                                                                                                                                                                                                                                                                                                                                                                                                                                                                                                                                                | 46.35 (7.52)    | 46.73 (8.32)  | 45.92 (6.59)  |                        |                        |                                       |     |    |    |    |                         |               |               |               |  |               |  |  |  |  |      |           |          |         |  |        |           |           |           |  |                  |  |  |  |  |       |           |           |           |  |       |         |         |         |  |       |         |         |         |  |       |         |         |         |  |                                     |               |               |               |  |                           |  |  |  |  |         |         |         |         |  |          |           |          |          |  |          |           |           |           |  |          |           |           |           |  |                |           |          |           |  |                             |  |  |  |  |                                      |           |           |           |  |           |         |         |         |  |           |         |         |         |  |                       |         |         |         |  |                       |  |  |  |  |          |             |             |             |  |         |             |             |             |  |                                     |  |  |  |  |          |              |              |              |  |         |              |              |              |  |  |  |
| 6 weeks                                                                                                                                                                                                                                                                                                                                                                                                                                                                                                                                                                                                                                                                                                                                                                                                                                                                                                                                                                                                                                                                                                                                                                                                                                                                                                                                                                                                                                                                                                                                                                                                                                                                                                                                                                                                                                                                                                                                                                                                                                                                                                                                                                                                                                                                                                                                                                                                                                                                                                                                                                                                                                                                                                                                                                                                                                                                                                                                                                                                                                                                                                                                                                                                                                 | 47.56 (9.26)    | 48.55 (9.64)  | 46.47 (8.78)  |                        |                        |                                       |     |    |    |    |                         |               |               |               |  |               |  |  |  |  |      |           |          |         |  |        |           |           |           |  |                  |  |  |  |  |       |           |           |           |  |       |         |         |         |  |       |         |         |         |  |       |         |         |         |  |                                     |               |               |               |  |                           |  |  |  |  |         |         |         |         |  |          |           |          |          |  |          |           |           |           |  |          |           |           |           |  |                |           |          |           |  |                             |  |  |  |  |                                      |           |           |           |  |           |         |         |         |  |           |         |         |         |  |                       |         |         |         |  |                       |  |  |  |  |          |             |             |             |  |         |             |             |             |  |                                     |  |  |  |  |          |              |              |              |  |         |              |              |              |  |  |  |
| <p><b>16a) CONSORT: For each group, number of participants (denominator) included in each analysis and whether the analysis was by original assigned groups</b></p> <p><b>16-i) Report multiple "denominators" and provide definitions</b></p>                                                                                                                                                                                                                                                                                                                                                                                                                                                                                                                                                                                                                                                                                                                                                                                                                                                                                                                                                                                                                                                                                                                                                                                                                                                                                                                                                                                                                                                                                                                                                                                                                                                                                                                                                                                                                                                                                                                                                                                                                                                                                                                                                                                                                                                                                                                                                                                                                                                                                                                                                                                                                                                                                                                                                                                                                                                                                                                                                                                          |                 |               |               |                        |                        |                                       |     |    |    |    |                         |               |               |               |  |               |  |  |  |  |      |           |          |         |  |        |           |           |           |  |                  |  |  |  |  |       |           |           |           |  |       |         |         |         |  |       |         |         |         |  |       |         |         |         |  |                                     |               |               |               |  |                           |  |  |  |  |         |         |         |         |  |          |           |          |          |  |          |           |           |           |  |          |           |           |           |  |                |           |          |           |  |                             |  |  |  |  |                                      |           |           |           |  |           |         |         |         |  |           |         |         |         |  |                       |         |         |         |  |                       |  |  |  |  |          |             |             |             |  |         |             |             |             |  |                                     |  |  |  |  |          |              |              |              |  |         |              |              |              |  |  |  |

|                                                                                                                                                                                                                                                                                                                                                                                                                                                                                                                                                                                                                                                                                                                                                                                                                                                                                                                                                                                                                                                                                                                                                                                                                                                                                                                                                                                                                                                                                                                                                                                                                                                                                                                                                                                                                                                                                                                                                                                                                                                                                                                                                                                                                                                                                                                                                                                                                                                                                                                                                                                                                                                                                                                                                                                                                                                                                                                                                                                                                                                                                                                                                                                                                                                                                                                                                                                                                                                                                                                                                                                                                                                                                                                                                                                                                                                                                                                                                                                                                                                                                                                                                                                                                                                                                                                                                                                                                                                                                                                                                                                                                                                                                                                                        |  |  |
|----------------------------------------------------------------------------------------------------------------------------------------------------------------------------------------------------------------------------------------------------------------------------------------------------------------------------------------------------------------------------------------------------------------------------------------------------------------------------------------------------------------------------------------------------------------------------------------------------------------------------------------------------------------------------------------------------------------------------------------------------------------------------------------------------------------------------------------------------------------------------------------------------------------------------------------------------------------------------------------------------------------------------------------------------------------------------------------------------------------------------------------------------------------------------------------------------------------------------------------------------------------------------------------------------------------------------------------------------------------------------------------------------------------------------------------------------------------------------------------------------------------------------------------------------------------------------------------------------------------------------------------------------------------------------------------------------------------------------------------------------------------------------------------------------------------------------------------------------------------------------------------------------------------------------------------------------------------------------------------------------------------------------------------------------------------------------------------------------------------------------------------------------------------------------------------------------------------------------------------------------------------------------------------------------------------------------------------------------------------------------------------------------------------------------------------------------------------------------------------------------------------------------------------------------------------------------------------------------------------------------------------------------------------------------------------------------------------------------------------------------------------------------------------------------------------------------------------------------------------------------------------------------------------------------------------------------------------------------------------------------------------------------------------------------------------------------------------------------------------------------------------------------------------------------------------------------------------------------------------------------------------------------------------------------------------------------------------------------------------------------------------------------------------------------------------------------------------------------------------------------------------------------------------------------------------------------------------------------------------------------------------------------------------------------------------------------------------------------------------------------------------------------------------------------------------------------------------------------------------------------------------------------------------------------------------------------------------------------------------------------------------------------------------------------------------------------------------------------------------------------------------------------------------------------------------------------------------------------------------------------------------------------------------------------------------------------------------------------------------------------------------------------------------------------------------------------------------------------------------------------------------------------------------------------------------------------------------------------------------------------------------------------------------------------------------------------------------------------------------|--|--|
| <p>"Baseline characteristics of trial participants are presented in Table 1. The mean age of participants was 44 years (SD=10.85); ages ranged between 24 and 69 years. Most participants were female (n=95, 88.8%), White (n=95, 88.8%), and working in the community setting (n=91, 85.0%). Participants were from a range of NHS clinical bands (band 4–8), with band 6 being the most common (n=47, 43.9%). A small number (n=5 ) of band 4 nursing associates were included, as they were experienced members of staff embedded within clinical teams during the pandemic, working alongside registered nurses in extended roles. The mean number of years of experience working in the nursing profession was 15.75 (SD=11.58)...Between August 2021 and May 2022, 134 nurses expressed an interest in participating in the study. Of 134, 108 completed the web-based consent process and prestudy survey. One participant was excluded on the basis of eligibility as he/she was a nursing student rather than an employed member of staff. Consented participants (n=107) were randomly assigned to the waitlist control (n=51) or REsOlUtiON program (n=56). Nine participants withdrew from the REsOlUtiON group prior to the intervention starting due to changing work commitments or annual leave requirements, which meant that they were unable to be allocated to a training cohort. At 6 weeks postenrollment, 93 participants had completed the poststudy survey, as 5 were lost to follow up and did not complete (2 in the waiting list group and 3 in the REsOlUtiON group)."</p> <p><b>16-ii) Primary analysis should be intent-to-treat</b></p>                                                                                                                                                                                                                                                                                                                                                                                                                                                                                                                                                                                                                                                                                                                                                                                                                                                                                                                                                                                                                                                                                                                                                                                                                                                                                                                                                                                                                                                                                                                                                                                                                                                                                                                                                                                                                                                                                                                                                                                                                                                                                                                                                                                                                                                                                                                                                                                                                                                                                                                                                                                                                                                                                                                                                                                                                                                                                                                                                                                                                                                                |  |  |
| <p><b>17a) CONSORT: For each primary and secondary outcome, results for each group, and the estimated effect size and its precision (such as 95% confidence interval)</b></p> <p>"Participants randomized to the REsOlUtiON program (n=56) did not differ significantly from participants randomized to the control group (n=51) with regard to age (t105=−0.26, P=.80), years working in the profession (t105=0.82, P=.42), gender (χ<sup>2</sup>21=0.2, P=.66), ethnicity (χ<sup>2</sup>21=1.96, P=.16), banding (χ<sup>2</sup>21=0.3, P=.57), nursing field (χ<sup>2</sup>21=0.8, P=.38), well-being (t105=−0.56, P=.58), or resilience (t105=0.58, P=.56) outcomes at baseline (Table 1). The baseline, prestudy survey indicated that all participants (n=107, 100%) recognized the importance of personal resilience in the workplace, with the majority rating it as extremely important (n=88, 82.2%)."</p> <p>"Participants were allocated to waitlist control and REsOlUtiON groups in 4 consecutive cohorts during the recruitment period. Cohort 1 had 14 people in the waitlist and 6 in the REsOlUtiON group; cohort 2 had 2 and 4; cohort 3 had 13 and 11; and cohort 4 had 22 and 26 participants, respectively. A total of 150 mentoring sessions and 16 facilitated sessions took place across the 4 cohorts. No mentors or facilitators reported the length of the sessions, but the mentoring sessions lasted between 30 minutes to 1 hour depending upon the number of participants allocated to the mentor, while the large-group facilitated sessions lasted up to 2 hours. Thus, the sessions were acceptable in terms of delivery and duration. The participant retention rate at 6 weeks was 96% (44/47) in the REsOlUtiON group; of these, 33 participants (75%) provided extra feedback on the REsOlUtiON program via an additional survey.</p> <p>Of the participants who completed the poststudy evaluation of the REsOlUtiON program (n=33), the majority thought that both the web-based workplace resilience training (n=30, 90.9%) and mentoring (n=29, 87.9%) had been useful; a minority felt that their participation in the training program had not impacted on their experience or outlook toward clinical practice (n=7, 21.2%). Participants felt that participation in the web-based training had been important for improving their levels of resilience (n=24, 72.8%), self-confidence (n=24, 72.7%), belief in their ability to provide good patient care (n=25, 75.8%), relationships with work colleagues (n=24, 72.7%), and communication skills with colleagues (n=25, 75.8%).</p> <p>Most participants who completed poststudy evaluation also found the content and sessions helpful (n=29, 87.9%), thought the training delivered an appropriate amount of information (n=27, 81.8%), and that the 4-week duration was about right for training of this type (n=23, 69.7%). The sessions on emotional intelligence and intellectual flexibility were rated most favorably, with 75.8% (n=25) indicating that they found it particularly helpful.</p> <p>Analysis of free text responses from REsOlUtiON program participants suggested that they enjoyed opportunities for learning and reflection offered by the training as well as the chance to build networks and interact with colleagues at all levels. Participants indicated that they enjoyed the networking, mentorship, and participatory sessions the most (n=16, 51.5%). However, ringfencing time to attend and engage with the sessions was the most reported challenge due to pressurized working environments. One participant highlighted the need for a cultural shift to support people to take more time for their own well-being. Participants also highlighted organization-wide issues and variability in the way sessions were run as detracting from their overall experience. Table 2 provides a summary of illustrative quotes."</p> <p>"Mean resilience and psychological well-being scores at baseline and 6 weeks for both groups are presented in Table 1. There were very little pre-post differences in resilience scores across control group (mean ± 0.01, SD 0.35) and REsOlUtiON group (mean 0.01, SD 0.27). The mean pre-post difference in psychological well-being scores was smaller in the control group (mean 0.55, SD 6.77) compared to the REsOlUtiON group (mean 1.82, SD 6.53). Two-way mixed ANOVAs revealed no statistically significant differences between groups and time (baseline and 6 weeks) on resilience scores (F<sub>1,105</sub>=0.20, P=.66, partial η<sup>2</sup>=0.002) and well-being scores (F<sub>1,105</sub>=0.97, P=.33, partial η<sup>2</sup>=0.009)."</p> |  |  |
| <p><b>17a-i) Presentation of process outcomes such as metrics of use and intensity of use</b></p>                                                                                                                                                                                                                                                                                                                                                                                                                                                                                                                                                                                                                                                                                                                                                                                                                                                                                                                                                                                                                                                                                                                                                                                                                                                                                                                                                                                                                                                                                                                                                                                                                                                                                                                                                                                                                                                                                                                                                                                                                                                                                                                                                                                                                                                                                                                                                                                                                                                                                                                                                                                                                                                                                                                                                                                                                                                                                                                                                                                                                                                                                                                                                                                                                                                                                                                                                                                                                                                                                                                                                                                                                                                                                                                                                                                                                                                                                                                                                                                                                                                                                                                                                                                                                                                                                                                                                                                                                                                                                                                                                                                                                                      |  |  |
| <p><b>17b) CONSORT: For binary outcomes, presentation of both absolute and relative effect sizes is recommended</b></p> <p>This information was not required for the study outcomes.</p> <p><b>18) CONSORT: Results of any other analyses performed, including subgroup analyses and adjusted analyses, distinguishing pre-specified from exploratory</b></p> <p>Not relevant to this study.</p> <p><b>18-i) Subgroup analysis of comparing only users</b></p>                                                                                                                                                                                                                                                                                                                                                                                                                                                                                                                                                                                                                                                                                                                                                                                                                                                                                                                                                                                                                                                                                                                                                                                                                                                                                                                                                                                                                                                                                                                                                                                                                                                                                                                                                                                                                                                                                                                                                                                                                                                                                                                                                                                                                                                                                                                                                                                                                                                                                                                                                                                                                                                                                                                                                                                                                                                                                                                                                                                                                                                                                                                                                                                                                                                                                                                                                                                                                                                                                                                                                                                                                                                                                                                                                                                                                                                                                                                                                                                                                                                                                                                                                                                                                                                                         |  |  |
| <p><b>19) CONSORT: All important harms or unintended effects in each group</b></p> <p>Not relevant to this study.</p> <p><b>19-i) Include privacy breaches, technical problems</b></p>                                                                                                                                                                                                                                                                                                                                                                                                                                                                                                                                                                                                                                                                                                                                                                                                                                                                                                                                                                                                                                                                                                                                                                                                                                                                                                                                                                                                                                                                                                                                                                                                                                                                                                                                                                                                                                                                                                                                                                                                                                                                                                                                                                                                                                                                                                                                                                                                                                                                                                                                                                                                                                                                                                                                                                                                                                                                                                                                                                                                                                                                                                                                                                                                                                                                                                                                                                                                                                                                                                                                                                                                                                                                                                                                                                                                                                                                                                                                                                                                                                                                                                                                                                                                                                                                                                                                                                                                                                                                                                                                                 |  |  |
| <p><b>19-ii) Include qualitative feedback from participants or observations from staff/researchers</b></p>                                                                                                                                                                                                                                                                                                                                                                                                                                                                                                                                                                                                                                                                                                                                                                                                                                                                                                                                                                                                                                                                                                                                                                                                                                                                                                                                                                                                                                                                                                                                                                                                                                                                                                                                                                                                                                                                                                                                                                                                                                                                                                                                                                                                                                                                                                                                                                                                                                                                                                                                                                                                                                                                                                                                                                                                                                                                                                                                                                                                                                                                                                                                                                                                                                                                                                                                                                                                                                                                                                                                                                                                                                                                                                                                                                                                                                                                                                                                                                                                                                                                                                                                                                                                                                                                                                                                                                                                                                                                                                                                                                                                                             |  |  |
| <p><b>DISCUSSION</b></p> <p><b>20) CONSORT: Trial limitations, addressing sources of potential bias, imprecision, multiplicity of analyses</b></p> <p><b>20-i) Typical limitations in ehealth trials</b></p> <p>"To our knowledge, REsOlUtiON was the first web-based training piloted on nurses working during the COVID-19 pandemic and has highlighted many benefits of providing such a resource to nurses working under highly pressurized conditions. In addition, the engagement and acceptability outcomes have been achieved as indicated by the high study recruitment and adherence rates and from the qualitative survey feedback. This confirms that it is possible to implement web-based resilience training programs for nurses within busy workplace environments with successful engagement from nurses.</p> <p>Study limitations include the small sample size, and hence robust conclusions on psychological well-being and resilience outcomes cannot be made. In addition, this study was conducted at only one NHS trust; future studies should be conducted across a range of NHS health and social care settings to increase the generalizability of the findings. Finally, conducting a study during the COVID-19 pandemic may have influenced the findings, as nurses were working under even more pressurized conditions than usual [1,23,44], which may have influenced their responses due to heightened levels of stress and anxiety. Care must be taken to be aware of these issues when implementing similar resources across health and social care settings in the peri- and postpandemic era."</p>                                                                                                                                                                                                                                                                                                                                                                                                                                                                                                                                                                                                                                                                                                                                                                                                                                                                                                                                                                                                                                                                                                                                                                                                                                                                                                                                                                                                                                                                                                                                                                                                                                                                                                                                                                                                                                                                                                                                                                                                                                                                                                                                                                                                                                                                                                                                                                                                                                                                                                                                                                                                                                                                                                                                                                                                                                                                                                                                                                                                                                                                                                 |  |  |
| <p><b>21) CONSORT: Generalisability (external validity, applicability) of the trial findings</b></p> <p><b>21-i) Generalizability to other populations</b></p>                                                                                                                                                                                                                                                                                                                                                                                                                                                                                                                                                                                                                                                                                                                                                                                                                                                                                                                                                                                                                                                                                                                                                                                                                                                                                                                                                                                                                                                                                                                                                                                                                                                                                                                                                                                                                                                                                                                                                                                                                                                                                                                                                                                                                                                                                                                                                                                                                                                                                                                                                                                                                                                                                                                                                                                                                                                                                                                                                                                                                                                                                                                                                                                                                                                                                                                                                                                                                                                                                                                                                                                                                                                                                                                                                                                                                                                                                                                                                                                                                                                                                                                                                                                                                                                                                                                                                                                                                                                                                                                                                                         |  |  |
| <p><b>21-ii) Discuss if there were elements in the RCT that would be different in a routine application setting</b></p>                                                                                                                                                                                                                                                                                                                                                                                                                                                                                                                                                                                                                                                                                                                                                                                                                                                                                                                                                                                                                                                                                                                                                                                                                                                                                                                                                                                                                                                                                                                                                                                                                                                                                                                                                                                                                                                                                                                                                                                                                                                                                                                                                                                                                                                                                                                                                                                                                                                                                                                                                                                                                                                                                                                                                                                                                                                                                                                                                                                                                                                                                                                                                                                                                                                                                                                                                                                                                                                                                                                                                                                                                                                                                                                                                                                                                                                                                                                                                                                                                                                                                                                                                                                                                                                                                                                                                                                                                                                                                                                                                                                                                |  |  |
| <p><b>22) CONSORT: Interpretation consistent with results, balancing benefits and harms, and considering other relevant evidence</b></p> <p><b>22-i) Restate study questions and summarize the answers suggested by the data, starting with primary outcomes and process outcomes (use)</b></p> <p>"Our findings have shown that nurse participants engaged with REsOlUtiON program, as evidenced by the high recruitment rate to the pilot study. The training was acceptable to nurses working in frontline clinical settings; this is demonstrated by the large number of participants who enrolled in and completed the study. While a small number of participants withdrew from the study or were lost to follow up, the majority of these withdrew prior to the training commencing due to changing work commitments, meaning that they were no longer able to join a cohort. Participant feedback demonstrated that most participants clearly valued the importance of protecting their resilience within the workplace. Most participants were receptive toward the REsOlUtiON program and reported that they felt it was an important tool for helping to enhance their resilience, confidence, patient care provision, and relationships with work colleagues; this demonstrates the potential application of web-based resilience tools for this population group. Overall, the REsOlUtiON program was well received and identified a desire from nurses for web-based resilience training tools to be implemented as a way of optimizing resilience, psychological health, communication practices, and the workplace environment. Though there were no significant differences between REsOlUtiON and waitlist control groups at 6 weeks in terms of resilience and psychological well-being, these results must be considered alongside the small sample size, due to the pilot nature of the trial."</p> <p><b>22-ii) Highlight unanswered new questions, suggest future research</b></p>                                                                                                                                                                                                                                                                                                                                                                                                                                                                                                                                                                                                                                                                                                                                                                                                                                                                                                                                                                                                                                                                                                                                                                                                                                                                                                                                                                                                                                                                                                                                                                                                                                                                                                                                                                                                                                                                                                                                                                                                                                                                                                                                                                                                                                                                                                                                                                                                                                                                                                                                                                                                                                                                                                                              |  |  |
| <p><b>Other information</b></p> <p><b>23) CONSORT: Registration number and name of trial registry</b></p> <p>"ClinicalTrials.gov NCT05074563"</p> <p><b>24) CONSORT: Where the full trial protocol can be accessed, if available</b></p>                                                                                                                                                                                                                                                                                                                                                                                                                                                                                                                                                                                                                                                                                                                                                                                                                                                                                                                                                                                                                                                                                                                                                                                                                                                                                                                                                                                                                                                                                                                                                                                                                                                                                                                                                                                                                                                                                                                                                                                                                                                                                                                                                                                                                                                                                                                                                                                                                                                                                                                                                                                                                                                                                                                                                                                                                                                                                                                                                                                                                                                                                                                                                                                                                                                                                                                                                                                                                                                                                                                                                                                                                                                                                                                                                                                                                                                                                                                                                                                                                                                                                                                                                                                                                                                                                                                                                                                                                                                                                               |  |  |

|                                                                                                                                                                                                                                                |  |  |
|------------------------------------------------------------------------------------------------------------------------------------------------------------------------------------------------------------------------------------------------|--|--|
| The full trial protocol has been published in JMIR Res Protoc:                                                                                                                                                                                 |  |  |
| Srikesavan, C, Davey, Z, Cipriani, A, Henshall, C (2022) Resilience Enhancement Online Training for Nurses (REsOluTioN): Protocol for a Pilot Randomised Controlled Trial. JMIR Res Protoc 2022;11(8):e37015 doi: 10.2196/37015 PMID: 35862692 |  |  |
| <b>25) CONSORT: Sources of funding and other support (such as supply of drugs), role of funders</b>                                                                                                                                            |  |  |
| "This study is funded by the Burdett Trust for Nursing (SB\ZA\101010662\633134)."                                                                                                                                                              |  |  |
| <b>X26-i) Comment on ethics committee approval</b>                                                                                                                                                                                             |  |  |
| <b>x26-ii) Outline informed consent procedures</b>                                                                                                                                                                                             |  |  |
| <b>X26-iii) Safety and security procedures</b>                                                                                                                                                                                                 |  |  |
| <b>X27-i) State the relation of the study team towards the system being evaluated</b>                                                                                                                                                          |  |  |
